# Supplementary material
Source: PubMed Central journal article supplement (PMC2782448)
Supplement: NIHMS154900-supplement-supplmental_data.pdf [file NIHMS154900-supplement-supplmental_data.pdf]

Lung Metastasis Gene List in NKI295  
(*van't Veer et al. Nature.2002 415:530-6*)

A.

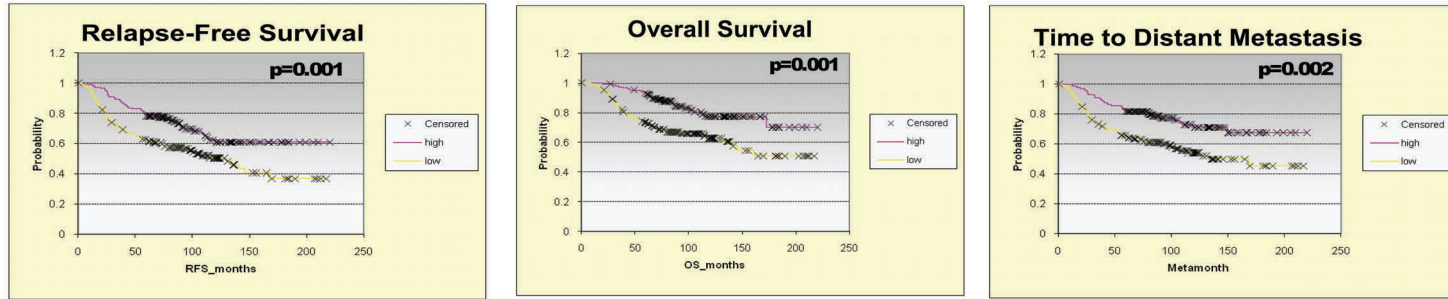

B.

WNT Signature Gene List in NKI295  
(*van't Veer et al. Nature.2002 415:530-6*)

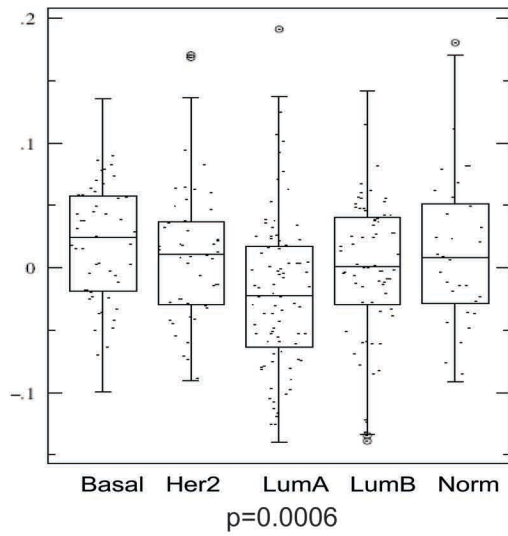

WNT Signature Gene List in UNC 232  
(*Herschkowitz et al. Genome Biol.2007 8(5):R76.*)

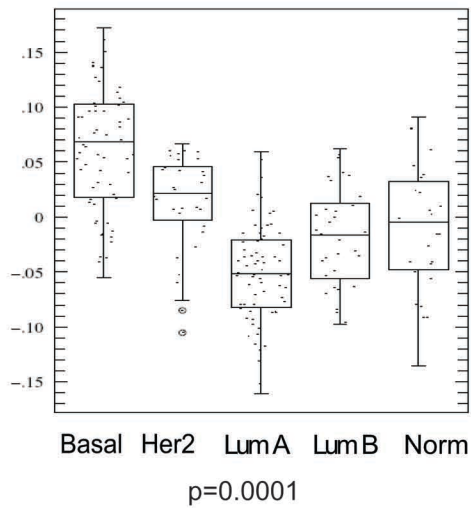

WNT Signature Gene List in UNC 12  
(*Hu et al. BMC Genomics 2006 Apr 27;7:96.*)

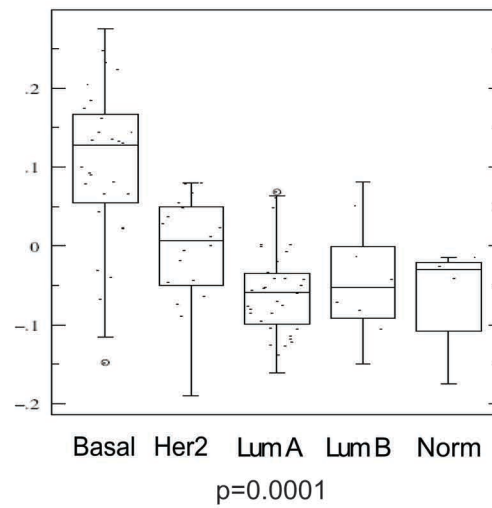

# Supplemental Figure 2: Validation of Wnt genes and activity from microarray

A

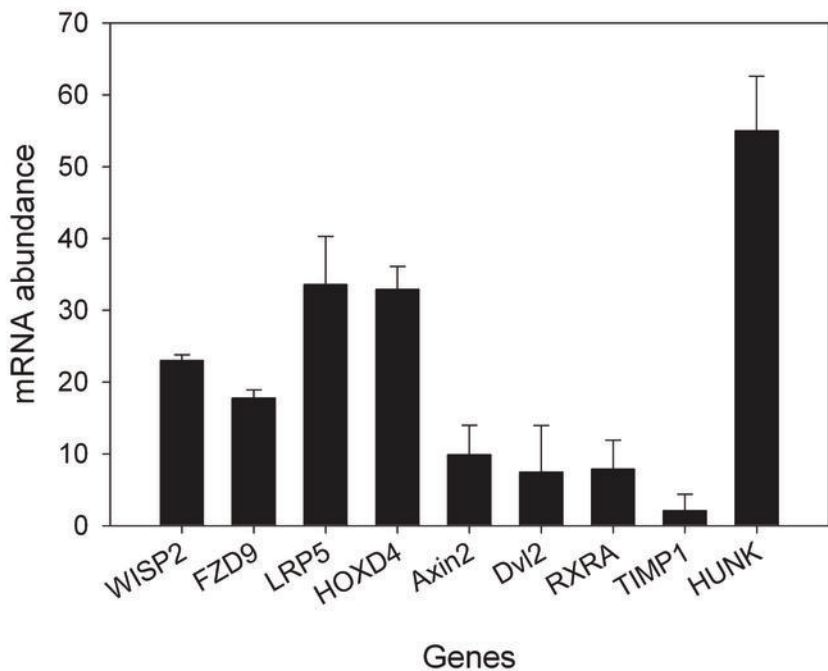

B

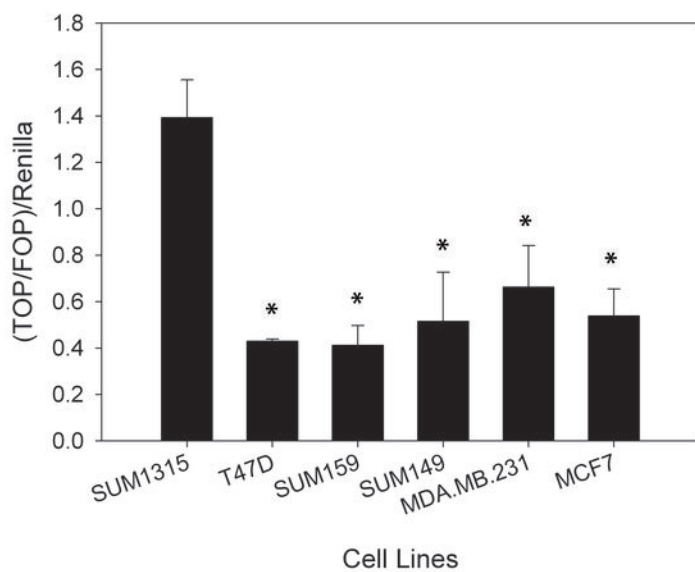



Supplemental Figure 4

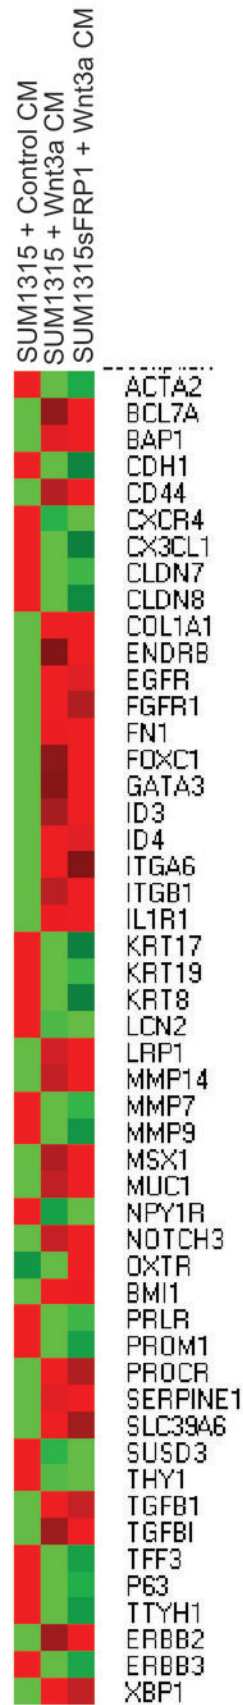

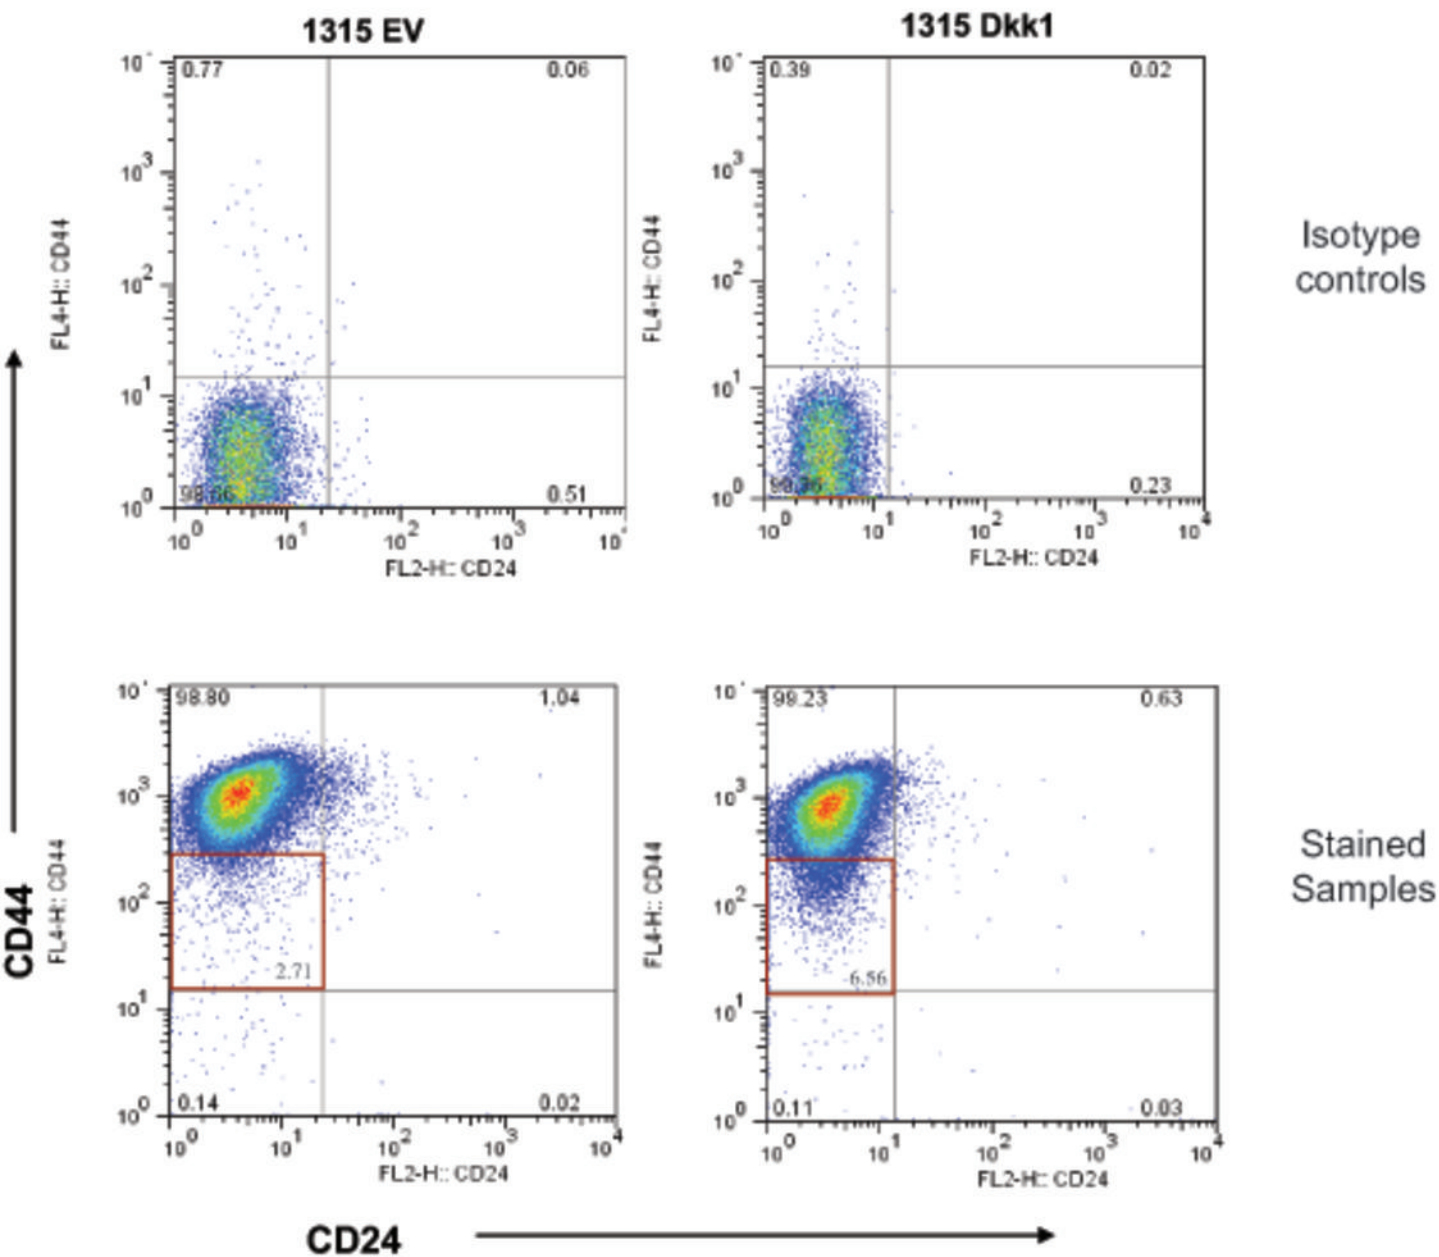

**Supplementary Table 1: Microarray Data**

| <b>GenBank ID</b> | <b>T-Test</b> | <b>Lung Normal Fold Change</b> |          | <b>Gene Name</b> | <b>Description</b>                                                  |
|-------------------|---------------|--------------------------------|----------|------------------|---------------------------------------------------------------------|
| NM_000558         | 7.22E-08      | 7.13E+00                       | 7.13E+00 | HBA1             | Hemoglobin, alpha 1                                                 |
| NM_000429         | 1.50E-07      | 5.83E+00                       | 5.83E+00 | MAT1A            | Methionine adenosyltransferase I, alpha                             |
| D25266            | 3.98E-06      | 5.00E+00                       | 5.00E+00 |                  | HUMRES413 Homo sapiens cDNA                                         |
| NM_004181         | 3.95E-06      | 4.86E+00                       | 4.86E+00 | UCHL1            | Ubiquitin carboxyl-terminal esterase L1 (ubiquitin thiolesterase)   |
| NM_031219         | 3.61E-06      | 4.73E+00                       | 4.73E+00 | MGC12904         | Hypothetical protein MGC12904                                       |
| NM_018670         | 2.57E-07      | 4.70E+00                       | 4.70E+00 | IR1899308        | mesoderm posterior 1 homolog (mouse)                                |
| NM_032982         | 0.00168       | 4.557                          | 4.557    | CASP2            | Caspase 2, apoptosis-related cysteine protease                      |
| NM_000900         | 2.74E-06      | 4.47E+00                       | 4.47E+00 | MGP              | Matrix Gla protein                                                  |
| NM_000542         | 1.86E-06      | 4.29E+00                       | 4.29E+00 | SFTPB            | Surfactant, pulmonary-associated protein B                          |
| NM_003083         | 5.25E-07      | 4.26E+00                       | 4.26E+00 | SNAPC2           | Small nuclear RNA activating complex, polypeptide 2, 45kD           |
| NM_002072         | 2.28E-06      | 4.14E+00                       | 4.14E+00 | GNAQ             | Guanine nucleotide binding protein (G protein), q polypeptide       |
| AK055576          | 5.06E-07      | 4.11E+00                       | 4.11E+00 | MPN              | Marapsin                                                            |
| NM_005786         | 7.68E-06      | 4.09E+00                       | 4.09E+00 | SDCCAG33         | Serologically defined colon cancer antigen 33                       |
| NM_003759         | 0.00382       | 4.038                          | 4.038    | SLC4A4           | Solute carrier family 4, sodium bicarbonate cotransporter, member 4 |
| NM_001215         | 6.92E-06      | 4.02E+00                       | 4.02E+00 | CA6              | Carbonic anhydrase VI                                               |
| NM_030570         | 1.96E-07      | 3.93E+00                       | 3.93E+00 | MGC10902         | uroplakin 3b                                                        |
| L17326            | 3.35E-07      | 3.88E+00                       | 3.88E+00 | 1F6              | 1f6 protein                                                         |
| AB051550          | 0.00682       | 3.733                          | 3.733    | KIAA1763         | contactin associated protein like 4                                 |
| AF401315          | 6.58E-08      | 3.66E+00                       | 3.66E+00 | KCTD13           | Homo sapiens polymerase delta-interacting protein 1 mRNA,           |
| AK025774          | 5.38E-05      | 3.65E+00                       | 3.65E+00 | VPS35            | Vacuolar protein sorting 35 (yeast)                                 |
| NM_012162         | 3.04E-07      | 3.50E+00                       | 3.50E+00 | FBXL6            | F-box and leucine-rich repeat protein 6                             |
| NM_001424         | 2.58E-06      | 3.49E+00                       | 3.49E+00 | EMP2             | Epithelial membrane protein 2                                       |
| NM_001008         | 0.000433      | 3.464                          | 3.464    | RPS4Y            | Ribosomal protein S4, Y-linked                                      |
| NM_001454         | 0.00162       | 3.373                          | 3.373    | FOXJ1            | Forkhead box J1                                                     |
| NM_021226         | 3.02E-06      | 3.33E+00                       | 3.33E+00 | LOC58504         | rho gtpase activating protein 22                                    |
| U38654            | 3.03E-06      | 3.27E+00                       | 3.27E+00 | RAB27A           | RAB27A, member RAS oncogene family                                  |
| NM_000239         | 2.80E-06      | 3.27E+00                       | 3.27E+00 | LYZ              | Lysozyme (renal amyloidosis)                                        |
| NM_025203         | 1.78E-06      | 3.27E+00                       | 3.27E+00 | FLJ21945         | Hypothetical protein FLJ21945                                       |
| NM_033506         | 2.91E-07      | 3.21E+00                       | 3.21E+00 | FBXO24           | F-box only protein 24                                               |
| BC013885          | 2.55E-05      | 3.14E+00                       | 3.14E+00 | EPB41L1          | erythrocyte membrane protein band 4.1-like 1                        |
| AL162069          | 0.0188        | 3.121                          | 3.121    | LOC144501        | hypothetical protein loc144501                                      |
| NM_025217         | 5.67E-07      | 3.12E+00                       | 3.12E+00 | ULBP2            | UL16 binding protein 2                                              |
| AJ007557          | 2.06E-05      | 3.11E+00                       | 3.11E+00 | KCNJ13           | Potassium inwardly-rectifying channel, subfamily J, member 13       |
| NM_017980         | 1.36E-05      | 3.04E+00                       | 3.04E+00 | FLJ10044         | lim and senescent cell antigen-like domains 2                       |

|           |          |          |                   |                                                                        |
|-----------|----------|----------|-------------------|------------------------------------------------------------------------|
| NM_021944 | 0.00415  | 2.972    | 2.972 FLJ12154    | Hypothetical protein FLJ12154                                          |
| NM_024712 | 3.86E-06 | 2.97E+00 | 2.97E+00 ELMO3    | Engulfment and cell motility 3 (ced-12 homolog, <i>C. elegans</i> )    |
| BC016979  | 9.02E-05 | 2.95E+00 | 2.95E+00 LOC54550 | Hypothetical protein                                                   |
| NM_001136 | 5.82E-07 | 2.94E+00 | 2.94E+00 AGER     | Advanced glycosylation end product-specific receptor                   |
| NM_000366 | 0.001    | 2.848    | 2.848 TPM1        | Tropomyosin 1 (alpha)                                                  |
| AW841753  | 0.00209  | 2.836    | 2.836             | zymogen granule protein 16                                             |
| NM_004863 | 0.00169  | 2.836    | 2.836 SPTLC2      | Serine palmitoyltransferase, long chain base subunit 2                 |
| BE961032  | 1.71E-05 | 2.80E+00 | 2.80E+00 COX6A1   | Human DNA sequence from BAC 15E1 on chromosome 12.                     |
| NM_003874 | 1.83E-05 | 2.75E+00 | 2.75E+00 CD84     | CD84 antigen (leukocyte antigen)                                       |
| NM_016579 | 4.17E-05 | 2.73E+00 | 2.73E+00 8D6A     | 8D6 antigen                                                            |
| AK001143  | 0.000223 | 2.718    | 2.718 LOC220906   | Homo sapiens cDNA FLJ10281 fis, clone HEMBB1001289                     |
| NM_000177 | 7.32E-05 | 2.70E+00 | 2.70E+00 GSN      | Gelsolin (amyloidosis, Finnish type)                                   |
| AK021542  | 0.0002   | 2.671    | 2.671             | fij41170 protein                                                       |
| NM_001888 | 0.00319  | 2.622    | 2.622 CRYM        | Crystallin, mu                                                         |
| NM_001900 | 6.72E-05 | 2.61E+00 | 2.61E+00 CST5     | Cystatin D                                                             |
| AK024465  | 2.35E-06 | 2.59E+00 | 2.59E+00 FLJ00058 | guanine nucleotide binding protein (g protein), gamma 7                |
| AK027362  | 0.00168  | 2.571    | 2.571 FLJ20727    | ubiquitin specific peptidase 47                                        |
| U92980    | 0.000241 | 2.568    | 2.568 DT1P1A10    | Hypothetical protein DT1P1A10                                          |
| NM_001216 | 5.51E-06 | 2.56E+00 | 2.56E+00 CA9      | Carbonic anhydrase IX                                                  |
| NM_016369 | 4.17E-05 | 2.55E+00 | 2.55E+00 CLDN18   | Claudin 18                                                             |
| AB067498  | 0.000305 | 2.536    | 2.536 KIAA1911    | establishment of cohesin 1 homolog 1 ( <i>s.cerevisiae</i> )           |
| NM_003926 | 2.16E-05 | 2.52E+00 | 2.52E+00 MBD3     | Methyl-CpG binding domain protein 3                                    |
| AB040976  | 5.76E-05 | 2.52E+00 | 2.52E+00 KIAA1543 | KIAA1543 protein                                                       |
| M80899    | 0.000239 | 2.514    | 2.514 AHNAK       | AHNAK nucleoprotein (desmoyokin)                                       |
| AB014574  | 9.88E-05 | 2.50E+00 | 2.50E+00 KIAA0674 | KIAA0674 protein                                                       |
| AK055309  | 0.019    | 2.499    | 2.499 ZNF285      | zinc finger protein 285                                                |
| NM_017986 | 0.00544  | 2.449    | 2.449 FLJ10060    | g protein-coupled receptor 172b                                        |
| NM_033158 | 0.000163 | 2.415    | 2.415 HYAL2       | Hyaluronoglucosaminidase 2                                             |
| NM_014291 | 0.000624 | 2.408    | 2.408 GCAT        | Glycine C-acetyltransferase (2-amino-3-ketobutyrate coenzyme A ligase) |
| AK055994  | 0.0482   | 2.404    | 2.404 FLJ25084    | skin aspartic protease                                                 |
| NM_002307 | 3.92E-05 | 2.39E+00 | 2.39E+00 LGALS7   | Lectin, galactoside-binding, soluble, 7 (galectin 7)                   |
| AB033048  | 0.000223 | 2.371    | 2.371 PPP1R9A     | Protein phosphatase 1, regulatory (inhibitor) subunit 9A               |
| AK027598  | 1.84E-05 | 2.36E+00 | 2.36E+00 ATP10D   | ATPase, Class V, type 10D                                              |
| NM_000190 | 5.59E-06 | 2.35E+00 | 2.35E+00 HMBS     | Hydroxymethylbilane synthase                                           |
| AB038651  | 3.64E-05 | 2.35E+00 | 2.35E+00 LOC57106 | K562 cell-derived leucine-zipper-like protein 1                        |
| NM_015994 | 6.72E-05 | 2.33E+00 | 2.33E+00 ATP6M    | ATPase, H <sup>+</sup> transporting, lysosomal (vacuolar proton pump)  |
| AB051558  | 0.00662  | 2.317    | 2.317 KIAA1771    | dedicator of cytokinesis 7                                             |

|           |          |          |          |           |                                                                                    |
|-----------|----------|----------|----------|-----------|------------------------------------------------------------------------------------|
| AK057870  | 2.20E-05 | 2.31E+00 | 2.31E+00 | WBSCR16   | williams-beuren syndrome chromosome region 16                                      |
| NM_014564 | 1.51E-05 | 2.31E+00 | 2.31E+00 | LHX3      | LIM homeobox protein 3                                                             |
| NM_053049 | 0.000833 | 2.305    | 2.305    | SPC       | Stresscopin                                                                        |
| NM_002758 | 0.0122   | 2.301    | 2.301    | MAP2K6    | Mitogen-activated protein kinase kinase 6                                          |
| NM_003417 | 0.0205   | 2.284    | 2.284    | ZNF264    | Zinc finger protein 264                                                            |
| NM_014427 | 0.00683  | 2.274    | 2.274    | CPNE7     | Copine VII                                                                         |
| NM_005556 | 0.00941  | 2.269    | 2.269    | KRT7      | Keratin 7                                                                          |
| NM_002957 | 0.0136   | 2.26     | 2.26     | RXRA      | Retinoid X receptor, alpha                                                         |
| AK025225  | 1.15E-05 | 2.25E+00 | 2.25E+00 |           | neuronal guanine nucleotide exchange factor                                        |
| NM_000484 | 2.39E-05 | 2.23E+00 | 2.23E+00 | APP       | Amyloid beta (A4) precursor protein (protease nexin-II, Alzheimer disease)         |
| AB037745  | 0.000123 | 2.217    | 2.217    | KIAA1324  | KIAA1324 protein                                                                   |
| AB067524  | 7.57E-05 | 2.22E+00 | 2.22E+00 | KIAA1937  | forkhead-associated (fha) phosphopeptide binding domain 1                          |
| NM_003791 | 0.000717 | 2.164    | 2.164    | MBTPS1    | Membrane-bound transcription factor protease, site 1                               |
| AB046822  | 0.0285   | 2.161    | 2.161    | KIAA1602  | KIAA1602 protein                                                                   |
| NM_006987 | 0.00264  | 2.148    | 2.148    | RPH3AL    | Rabphilin 3A-like (without C2 domains)                                             |
| NM_001687 | 2.77E-05 | 2.15E+00 | 2.15E+00 | ATP5D     | ATP synthase, H <sup>+</sup> transporting, mitochondrial F1 complex, delta subunit |
| Y10520    | 2.96E-05 | 2.14E+00 | 2.14E+00 | HLA-C     | H.sapiens mRNA for HLA-C alpha chain (Cw*1701)                                     |
| AB051470  | 0.00439  | 2.132    | 2.132    | KIAA1683  | KIAA1683 protein                                                                   |
| NM_018106 | 0.000972 | 2.125    | 2.125    | FLJ10479  | zinc finger, dhhc-type containing 4                                                |
| NM_006713 | 0.0148   | 2.121    | 2.121    | PC4       | Activated RNA polymerase II transcription cofactor 4                               |
| L21934    | 0.00485  | 2.117    | 2.117    | SOAT1     | Sterol O-acyltransferase (acyl-Coenzyme A: cholesterol acyltransferase) 1          |
| NM_032995 | 0.000142 | 2.109    | 2.109    | ARHGEF4   | Rho guanine nucleotide exchange factor (GEF) 4                                     |
| BC007537  | 0.00146  | 2.096    | 2.096    | CSRP2BP   | CSRP2 binding protein                                                              |
| BC017280  | 0.0315   | 2.096    | 2.096    | TTS-2.2   | Transport-secretion protein 2.2,                                                   |
| NM_005539 | 1.80E-05 | 2.09E+00 | 2.09E+00 | INPP5A    | Inositol polyphosphate-5-phosphatase, 40kD                                         |
| AF352051  | 5.94E-05 | 2.09E+00 | 2.09E+00 | RBBP6     | Retinoblastoma binding protein 6                                                   |
| NM_016370 | 0.0208   | 2.084    | 2.084    | RAB9L     | RAB9-like protein                                                                  |
| AF116682  | 0.0014   | 2.083    | 2.083    | PRO2013   | Hypothetical protein PRO2013                                                       |
| NM_020995 | 0.000182 | 2.081    | 2.081    | HPR       | Haptoglobin-related protein                                                        |
| NM_005712 | 4.00E-05 | 2.07E+00 | 2.07E+00 | HHLA1     | HERV-H LTR-associating 1                                                           |
| NM_019056 | 0.00473  | 2.052    | 2.052    | P17.3     | Neuronal protein 17.3                                                              |
| NM_004684 | 0.000194 | 2.048    | 2.048    | SPARCL1   | SPARC-like 1 (mast9, hevin)                                                        |
| BC007899  | 5.80E-05 | 2.05E+00 | 2.05E+00 | LOC148898 | Homo sapiens, clone IMAGE:4298026, mRNA, partial cds                               |
| AK058044  | 0.000873 | 2.032    | 2.032    | C14orf50  | Homo sapiens cDNA FLJ25315 fis, clone TST00114                                     |
| L13283    | 0.00295  | 2.031    | 2.031    | MUC7      | mucin 7, salivary                                                                  |
| NM_013230 | 0.00129  | 2.025    | 2.025    | CD24      | CD24 antigen (small cell lung carcinoma cluster 4 antigen)                         |
| NM_019103 | 0.0409   | 2.019    | 2.019    | LOC55954  | zinc finger, matrin type 5                                                         |



|           |          |          |                     |                                                                          |
|-----------|----------|----------|---------------------|--------------------------------------------------------------------------|
| AB011116  | 0.00919  | 2.01     | 2.01 KIAA0544       | mahuginin, ring finger 1                                                 |
| AF020089  | 6.60E-05 | 2.01E+00 | 2.01E+00 STK29      | Serine/threonine kinase 29                                               |
| BC015858  | 1.85E-05 | 2.00E+00 | 2.00E+00 ZNF37A     | Zinc finger protein 37a (KOX 21)                                         |
| NM_000355 | 0.00195  | 2.003    | 2.003 TCN2          | Transcobalamin II; macrocytic anemia                                     |
| NM_005296 | 0.0166   | 1.997    | 1.997 GPR23         | G protein-coupled receptor 23                                            |
| NM_004381 | 0.015    | 1.984    | 1.984 CREBL1        | CAMP responsive element binding protein-like 1                           |
| AY014272  | 0.0271   | 1.971    | 1.971 FKSG30        | actin-like protein                                                       |
| AJ005866  | 0.00201  | 1.968    | 1.968 SQV7L         | Nucleotide-sugar transporter similar to <i>C. elegans</i> sqv-7          |
| AK056006  | 0.0205   | 1.967    | 1.967 LOC148206     | zinc finger protein 714                                                  |
| NM_000274 | 0.000347 | 1.962    | 1.962 OAT           | Ornithine aminotransferase (gyrate atrophy)                              |
| NM_030813 | 0.00906  | 1.957    | 1.957 SKD3          | Suppressor of potassium transport defect 3                               |
| NM_006453 | 0.0037   | 1.952    | 1.952 TBL3          | Transducin (beta)-like 3                                                 |
| AK056173  | 0.000999 | 1.941    | 1.941 FLJ38753      | kelch domain containing 7a                                               |
| NM_024675 | 0.0394   | 1.94     | 1.94 FLJ21816       | hypothetical protein flj21816                                            |
| AK002044  | 0.0239   | 1.938    | 1.938 SLC39A3       | solute carrier family 39 (zinc transporter), member 3                    |
| AK054728  | 0.0109   | 1.924    | 1.924 CALCB         | Calcitonin-related polypeptide, beta                                     |
| AL390158  | 6.46E-05 | 1.92E+00 | 1.92E+00 DKFZp761G2 | ataxin 7-like 3                                                          |
| NM_001678 | 0.00977  | 1.923    | 1.923 ATP1B2        | ATPase, Na <sup>+</sup> /K <sup>+</sup> transporting, beta 2 polypeptide |
| NM_003355 | 0.00408  | 1.916    | 1.916 UCP2          | Uncoupling protein 2 (mitochondrial, proton carrier)                     |
| NM_013392 | 0.000384 | 1.914    | 1.914 NRBP          | Nuclear receptor binding protein                                         |
| NM_022343 | 0.00126  | 1.913    | 1.913 LOC64148      | 17kD fetal brain protein                                                 |
| NM_000883 | 0.0384   | 1.901    | 1.901 IMPDH1        | IMP (inosine monophosphate) dehydrogenase 1                              |
| NM_001037 | 0.00809  | 1.896    | 1.896 SCN1B         | Sodium channel, voltage-gated, type I, beta polypeptide                  |
| NM_006650 | 0.00482  | 1.895    | 1.895 CPLX2         | Complexin 2                                                              |
| AK054643  | 0.00617  | 1.888    | 1.888 MGC45873      | sterile alpha motif domain containing 11                                 |
| NM_024123 | 0.0199   | 1.887    | 1.887 G6E           | Putative Ly-6 superfamily member                                         |
| NM_015959 | 0.00151  | 1.882    | 1.882 LOC51075      | CGI-31 protein                                                           |
| AK001064  | 0.00264  | 1.881    | 1.881 DKFZp434P0    | Homo sapiens cDNA FLJ10202 fis, clone HEMBA1004929                       |
| AF161369  | 0.00967  | 1.875    | 1.875               | bromodomain containing 4                                                 |
| AK057708  | 0.00709  | 1.87     | 1.87 NLVCF          | Nuclear localization signal deleted in velocardiofacial syndrome         |
| NM_006842 | 0.0202   | 1.867    | 1.867 SF3B2         | Splicing factor 3b, subunit 2, 145kD                                     |
| NM_015658 | 0.00252  | 1.852    | 1.852 DKFZP564C1    | nucleolar complex associated 2 homolog ( <i>s. cerevisiae</i> )          |
| NM_006925 | 5.19E-05 | 1.85E+00 | 1.85E+00 SFRS5      | Splicing factor, arginine/serine-rich 5                                  |
| NM_001176 | 0.00567  | 1.848    | 1.848 ARHGDI3       | Rho GDP dissociation inhibitor (GDI) gamma                               |
| NM_006851 | 0.0204   | 1.836    | 1.836 RTVP1         | Glioma pathogenesis-related protein                                      |
| NM_012385 | 0.00167  | 1.835    | 1.835 P8            | P8 protein (candidate of metastasis 1)                                   |
| NM_001134 | 0.00146  | 1.821    | 1.821 AFP           | Alpha-fetoprotein                                                        |

|           |          |          |          |             |                                                                       |
|-----------|----------|----------|----------|-------------|-----------------------------------------------------------------------|
| NM_005607 | 0.00157  | 1.819    | 1.819    | PTK2        | PTK2 protein tyrosine kinase 2                                        |
| NM_024893 | 0.00444  | 1.817    | 1.817    | C20orf39    | chromosome 20 open reading frame 39                                   |
| AK025348  | 0.00122  | 1.811    | 1.811    | THRAP2      | thyroid hormone receptor associated protein 2                         |
| NM_004847 | 0.00176  | 1.811    | 1.811    | AIF1        | Allograft inflammatory factor 1                                       |
| NM_006875 | 0.00688  | 1.808    | 1.808    | PIM2        | Pim-2 oncogene                                                        |
| NM_002147 | 0.00455  | 1.807    | 1.807    | HOXB5       | Homeo box B5                                                          |
| AK023855  | 0.00226  | 1.806    | 1.806    |             | paired box gene 8                                                     |
| NM_005969 | 0.00599  | 1.8      | 1.8      | NAP1L4      | Nucleosome assembly protein 1-like 4                                  |
| AF268897  | 0.00143  | 1.795    | 1.795    | KCNC2; KV3. | Homo sapiens voltage gated potassium channel Kv3.2a mRNA,             |
| AK001603  | 0.0143   | 1.795    | 1.795    | GTPBP5      | GTP binding protein 5 (putative)                                      |
| BC016964  | 0.0264   | 1.795    | 1.795    | MGC21621    | Homo sapiens, clone MGC:21621 IMAGE:4181577, mRNA,                    |
| NM_023076 | 0.00262  | 1.79     | 1.79     | FLJ23360    | Hypothetical protein FLJ23360                                         |
| NM_014178 | 0.0495   | 1.782    | 1.782    | HSPC156     | syntaxin binding protein 6 (amisyn)                                   |
| NM_018983 | 0.00225  | 1.779    | 1.779    | NOLA1       | Nucleolar protein family A, member 1 (H/ACA small nucleolar RNPs)     |
| NM_021818 | 0.0112   | 1.775    | 1.775    | WW45        | WW Domain-Containing Gene                                             |
| NM_025107 | 0.0159   | 1.768    | 1.768    | FLJ21269    | myc target 1                                                          |
| NM_003881 | 0.0172   | 1.767    | 1.767    | WISP2       | WNT1 inducible signaling pathway protein 2                            |
| NM_033343 | 9.94E-05 | 1.77E+00 | 1.77E+00 | LHX4        | LIM homeobox protein 4                                                |
| NM_002537 | 0.0215   | 1.765    | 1.765    | OAZ2        | Ornithine decarboxylase antizyme 2                                    |
| NM_014369 | 0.000361 | 1.762    | 1.762    | PTPN18      | Protein tyrosine phosphatase, non-receptor type 18 (brain-derived)    |
| NM_004239 | 0.0213   | 1.76     | 1.76     | TRIP11      | Thyroid hormone receptor interactor 11                                |
| AK054637  | 0.00415  | 1.752    | 1.752    | LOC149773   | Homo sapiens cDNA FLJ30075 fis, clone BGGI11000285                    |
| NM_031211 | 0.00199  | 1.749    | 1.749    | LAT1-3TM    | LAT1-3TM protein                                                      |
| NM_001311 | 0.0139   | 1.747    | 1.747    | ENSG000001  | CYSTEINE-RICH PROTEIN 1 (CYSTEINE-RICH INTESTINAL PROTEIN) (CRIP)     |
| NM_017606 | 0.00812  | 1.745    | 1.745    | DKFZp434K1  | Hypothetical protein DKFZp434K1210                                    |
| NM_153255 | 0.0453   | 1.74     | 1.74     | ENSG000001  | DNA REPLICATION LICENSING FACTOR                                      |
| NM_032483 | 0.0424   | 1.737    | 1.737    | HTPAP       | HTPAP protein                                                         |
| AB058739  | 0.000796 | 1.734    | 1.734    | KIAA1836    | KIAA1836 protein                                                      |
| NM_019018 | 0.00098  | 1.733    | 1.733    | FLJ11127    | family with sequence similarity 105, member a                         |
| NM_030930 | 0.00246  | 1.73     | 1.73     | UNC93B1     | Unc-93 homolog B1 (C. elegans)                                        |
| NM_002488 | 0.0487   | 1.728    | 1.728    | NDUFA2      | NADH dehydrogenase (ubiquinone) 1 alpha subcomplex, 2 (8kD, B8)       |
| NM_014935 | 0.0115   | 1.716    | 1.716    | PEPP3       | Phosphoinositol 3-phosphate-binding protein-2                         |
| AB037764  | 0.0045   | 1.712    | 1.712    | FLJ10876    | rest corepressor 3                                                    |
| AF332229  | 0.00859  | 1.708    | 1.708    | GOLGA2LY    | Golgi autoantigen golgin subfamily a2-like                            |
| NM_052858 | 0.00731  | 1.708    | 1.708    | LOC91862    | Similar to RIKEN cDNA 1810006A16 gene                                 |
| NM_001909 | 0.000775 | 1.706    | 1.706    | CTSD        | Cathepsin D (lysosomal aspartyl protease)                             |
| NM_003144 | 0.00608  | 1.705    | 1.705    | SSR1        | Signal sequence receptor, alpha (translocon-associated protein alpha) |

|           |          |       |                   |                                                                              |
|-----------|----------|-------|-------------------|------------------------------------------------------------------------------|
| AK056832  | 0.0123   | 1.7   | 1.7               | vacuolar protein sorting 53 (yeast)                                          |
| NM_001927 | 0.0151   | 1.7   | 1.7 DES           | Desmin                                                                       |
| AB046771  | 0.00115  | 1.699 | 1.699 FLJ10652    | Homo sapiens mRNA for KIAA1551 protein, partial cds                          |
| AL080151  | 0.0202   | 1.699 | 1.699 LOC196993   | Homo sapiens mRNA; cDNA DKFZp434D024 (from clone DKFZp434D024)               |
| NM_031919 | 0.00421  | 1.696 | 1.696 CSDUFD1     | Cystatin and DUF19 domain containing 1                                       |
| NM_007007 | 0.00818  | 1.695 | 1.695 CPSF6       | Cleavage and polyadenylation specific factor 6, 68kD subunit                 |
| NM_080426 | 0.000611 | 1.695 | 1.695 ENSG000001  | GUANINE NUCLEOTIDE-BINDING PROTEIN G(S), ALPHA SUBUNIT                       |
| NM_024297 | 0.0233   | 1.694 | 1.694 MGC2941     | phd finger protein 23                                                        |
| NM_016108 | 0.00124  | 1.686 | 1.686 AIG-1       | Androgen induced protein                                                     |
| AL050090  | 0.00147  | 1.683 | 1.683 DKFZP586F1  | myosin viia and rab interacting protein                                      |
| AK027222  | 0.0049   | 1.681 | 1.681 A1BG        | Alpha-1-B glycoprotein                                                       |
| NM_024768 | 0.0469   | 1.676 | 1.676 FLJ12057    | coiled-coil domain containing 48                                             |
| AB007932  | 0.00143  | 1.668 | 1.668 PLXNA2      | Plexin A2                                                                    |
| NM_004938 | 0.0347   | 1.668 | 1.668 DAPK1       | Death-associated protein kinase 1                                            |
| NM_014654 | 0.019    | 1.664 | 1.664 SDC3        | Syndecan 3 (N-syndecan)                                                      |
| NM_024578 | 0.00624  | 1.664 | 1.664 FLJ22709    | hypothetical protein flj22709                                                |
| NM_005728 | 0.0226   | 1.663 | 1.663 ENDOGL2     | Endonuclease G-like 2                                                        |
| NM_032593 | 0.000548 | 1.663 | 1.663 HIT-17      | PKCI-1-related HIT protein                                                   |
| NM_021242 | 0.000444 | 1.659 | 1.659 STRAIT11499 | mid1 interacting protein 1 (gastrulation specific g12-like (zebrafish))      |
| NM_015646 | 0.00648  | 1.658 | 1.658 RAP1B       | RAP1B, member of RAS oncogene family                                         |
| NM_000830 | 0.00276  | 1.653 | 1.653 GRIK1       | Glutamate receptor, ionotropic, kainate 1                                    |
| NM_001651 | 0.00761  | 1.652 | 1.652 AQP5        | Aquaporin 5                                                                  |
| AK056680  | 0.000219 | 1.651 | 1.651             | similar to myosin regulatory light chain-like                                |
| NM_005491 | 0.0193   | 1.649 | 1.649 CXorf6      | Chromosome X open reading frame 6                                            |
| AB051478  | 0.00813  | 1.648 | 1.648 KIAA1691    | tweety homolog 3 (drosophila)                                                |
| NM_001120 | 0.0127   | 1.648 | 1.648 TETRAN      | Tetracycline transporter-like protein                                        |
| AB002364  | 0.0473   | 1.642 | 1.642 ADAMTS3     | A disintegrin-like and metalloprotease (reprolysin type) with thrombospondin |
| NM_006639 | 0.0247   | 1.641 | 1.641 CYSLT1      | Cysteinyl leukotriene receptor 1                                             |
| NM_014578 | 0.0104   | 1.641 | 1.641 ARHD        | Ras homolog gene family, member D                                            |
| D87011    | 0.00348  | 1.638 | 1.638 3'OY11.1    | suppressor of hairy wing homolog 1 (drosophila)                              |
| NM_001769 | 0.000484 | 1.637 | 1.637 CD9         | CD9 antigen (p24)                                                            |
| AB033036  | 0.015    | 1.635 | 1.635 KIAA1210    | KIAA1210 protein                                                             |
| NM_080753 | 0.00487  | 1.633 | 1.633 ENSG000001  | PUTATIVE PROTEASE INHIBITOR WAP10 PRECURSOR.                                 |
| NM_080818 | 0.000564 | 1.631 | 1.631 ENSG000001  | G PROTEIN-COUPLED RECEPTOR 80; G PROTEIN-COUPLED RECEPTOR                    |
| NM_007102 | 0.0252   | 1.628 | 1.628 GUCA2B      | Guanylate cyclase activator 2B (uroguanylin)                                 |
| AK057888  | 0.0025   | 1.627 | 1.627 LOC286090   | Homo sapiens cDNA FLJ25159 fis, clone CBR08036                               |
| NM_003001 | 0.045    | 1.622 | 1.622 SDHC        | Succinate dehydrogenase complex, subunit C, integral membrane protein,       |

|           |          |       |                  |                                                                            |
|-----------|----------|-------|------------------|----------------------------------------------------------------------------|
| AF435925  | 0.0328   | 1.621 | 1.621 VLGR1      | Very large G protein-coupled receptor 1                                    |
| NM_012326 | 0.000267 | 1.621 | 1.621 MAPRE3     | Microtubule-associated protein, RP/EB family, member 3                     |
| NM_014030 | 0.0239   | 1.62  | 1.62 GIT1        | G protein-coupled receptor kinase-interactor 1                             |
| NM_033030 | 0.0159   | 1.618 | 1.618 BOLL       | Bol, boule-like (Drosophila)                                               |
| NM_001287 | 0.00134  | 1.616 | 1.616 CLCN7      | Chloride channel 7                                                         |
| AB014520  | 0.000651 | 1.611 | 1.611 KIAA0620   | plexin d1                                                                  |
| NM_022371 | 0.0323   | 1.61  | 1.61 ADIR        | ATP-dependant interferon responsive                                        |
| NM_024949 | 0.0254   | 1.61  | 1.61 FLJ22029    | ww, c2 and coiled-coil domain containing 2                                 |
| AB053316  | 0.00111  | 1.609 | 1.609 ALS2CR15   | amyotrophic lateral sclerosis 2 (juvenile) c'some region, candidate 14     |
| NM_005935 | 0.00283  | 1.609 | 1.609 MLLT2      | Myeloid/lymphoid or mixed-lineage leukemia (trithorax homolog, Drosophila) |
| AK024332  | 0.00128  | 1.608 | 1.608 PDE7A      | phosphodiesterase 7a                                                       |
| BC012899  | 0.00599  | 1.608 | 1.608 NEU4       | sialidase 4                                                                |
| NM_015396 | 0.00164  | 1.607 | 1.607 DKFZP434A0 | armadillo repeat containing 8                                              |
| X83412    | 0.0484   | 1.605 | 1.605 HAB1       | B1 for mucin                                                               |
| NM_004555 | 0.00343  | 1.604 | 1.604 NFATC3     | Nuclear factor of activated T-cells, cytoplasmic, calcineurin-dependent 3  |
| NM_152437 | 0.0445   | 1.599 | 1.599 ENSG000001 | ZINC FINGER                                                                |
| NM_005199 | 0.0157   | 1.598 | 1.598 CHRNG      | Cholinergic receptor, nicotinic, gamma polypeptide                         |
| NM_002937 | 0.00757  | 1.597 | 1.597 RNASE4     | Ribonuclease, RNase A family, 4                                            |
| NM_014446 | 0.0195   | 1.596 | 1.596 MIBP       | Muscle-specific beta 1 integrin binding protein                            |
| NM_022034 | 0.0195   | 1.596 | 1.596 ERG-1      | Estrogen regulated gene 1                                                  |
| NM_003508 | 0.0015   | 1.595 | 1.595 FZD9       | Frizzled homolog 9 (Drosophila)                                            |
| AL137262  | 0.00643  | 1.593 | 1.593 TNIP2      | tnfaip3 interacting protein 2                                              |
| BC014111  | 0.021    | 1.593 | 1.593 LOC115704  | ecotropic viral integration site 5-like                                    |
| AF293337  | 0.00911  | 1.591 | 1.591 NBC4       | Sodium bicarbonate transporter 4                                           |
| AC008050  | 0.0277   | 1.589 | 1.589            | estrogen related receptor beta                                             |
| NM_000020 | 0.0161   | 1.589 | 1.589 ACVRL1     | Activin A receptor type II-like 1                                          |
| NM_005283 | 0.0133   | 1.589 | 1.589 CCXCR1     | Chemokine (C motif) XC receptor 1                                          |
| NM_006764 | 0.00112  | 1.589 | 1.589 IFRD2      | Interferon-related developmental regulator 2                               |
| NM_032854 | 0.000133 | 1.589 | 1.589 FLJ14871   | Hypothetical protein FLJ14871                                              |
| NM_003712 | 0.000346 | 1.588 | 1.588 PPAP2C     | Phosphatidic acid phosphatase type 2C                                      |
| AK025174  | 0.00328  | 1.586 | 1.586 GSDML      | gasdermin-like                                                             |
| NM_032261 | 0.0343   | 1.584 | 1.584 DKFZp434N0 | Hypothetical protein DKFZp434N0650                                         |
| AL049337  | 0.0176   | 1.583 | 1.583            | sry (sex determining region y)-box 5                                       |
| BC009447  | 0.0198   | 1.581 | 1.581 MGC15887   | Homo sapiens, clone MGC:15887 IMAGE:3530481, mRNA, complete cds            |
| AL137589  | 0.0408   | 1.574 | 1.574 DKFZP434K0 | f-box and leucine-rich repeat protein 19                                   |
| AF249277  | 0.0119   | 1.573 | 1.573 LOC283687  | Homo sapiens cervical cancer suppressor-1 mRNA, complete cds               |
| NM_024888 | 0.0266   | 1.572 | 1.572 FLJ11535   | plasticity-related gene 2                                                  |

|           |          |       |                  |                                                                            |
|-----------|----------|-------|------------------|----------------------------------------------------------------------------|
| NM_003820 | 0.0165   | 1.569 | 1.569 TNFRSF14   | Tumor necrosis factor receptor superfamily, member 14 (herpesvirus entry i |
| AL030997  | 0.00225  | 1.568 | 1.568            | spanx-n3 protein                                                           |
| AL109674  | 0.0073   | 1.568 | 1.568 RASGRF1    | ras protein-specific guanine nucleotide-releasing factor 1                 |
| AK024937  | 0.0389   | 1.567 | 1.567            | smad specific e3 ubiquitin protein ligase 1                                |
| X52015    | 0.00154  | 1.567 | 1.567 IL1RN      | Interleukin 1 receptor antagonist                                          |
| AB040893  | 0.0203   | 1.565 | 1.565 KIAA1460   | trinucleotide repeat containing 6a                                         |
| NM_001267 | 0.0092   | 1.565 | 1.565 CHAD       | Chondroadherin                                                             |
| NM_004073 | 0.00283  | 1.565 | 1.565 CNK        | Cytokine-inducible kinase                                                  |
| NM_007210 | 0.0235   | 1.565 | 1.565 GALNT6     | UDP-N-acetyl-alpha-D-galactosamine:polypeptide N-acetylgalactosaminyltr    |
| NM_032374 | 0.00123  | 1.565 | 1.565 MGC2562    | Hypothetical protein MGC2562                                               |
| AB051514  | 0.00238  | 1.564 | 1.564 KIAA1727   | KIAA1727 protein                                                           |
| NM_012093 | 0.000891 | 1.564 | 1.564 AK5        | Adenylate kinase 5                                                         |
| NM_012268 | 0.00776  | 1.564 | 1.564 HU-K4      | Similar to vaccinia virus HindIII K4L ORF                                  |
| AL121916  | 0.00363  | 1.563 | 1.563            | ribosomal protein l7a-like 2                                               |
| NM_000774 | 0.00989  | 1.563 | 1.563 CYP2F1     | Cytochrome P450, subfamily IIF, polypeptide 1                              |
| NM_006271 | 0.0422   | 1.563 | 1.563 S100A1     | S100 calcium binding protein A1                                            |
| NM_002292 | 0.00765  | 1.562 | 1.562 LAMB2      | Laminin, beta 2 (laminin S)                                                |
| NM_004923 | 0.0266   | 1.559 | 1.559 MTL5       | Metallothionein-like 5, testis-specific (tesmin)                           |
| BC010012  | 0.0211   | 1.558 | 1.558 WBP1       | WW domain binding protein 1                                                |
| NM_022124 | 0.000797 | 1.556 | 1.556 CDH23      | Cadherin related 23                                                        |
| AF217994  | 0.00632  | 1.553 | 1.553 OPLAH      | 5-oxoprolinase (ATP-hydrolysing)                                           |
| NM_032756 | 0.00312  | 1.553 | 1.553 MGC15668   | glyoxalase domain containing 1                                             |
| NM_004375 | 0.0315   | 1.552 | 1.552 COX11      | COX11 homolog, cytochrome c oxidase assembly protein (yeast)               |
| NM_014586 | 0.0351   | 1.551 | 1.551 HUNK       | Hormonally upregulated Neu-associated kinase                               |
| BC015210  | 0.0331   | 1.55  | 1.55 LOC132200   | chromosome 3 open reading frame 49                                         |
| AK057627  | 0.00111  | 1.548 | 1.548            | Homo sapiens cDNA FLJ33065 fis, clone TRACH2000081                         |
| NM_017600 | 0.00129  | 1.545 | 1.545 DKFZp434MC | golgi autoantigen, golgin subfamily a, 2-like 1                            |
| BC001233  | 0.00322  | 1.544 | 1.544 KIAA0092   | centrosomal protein 57kda                                                  |
| NM_022060 | 0.00668  | 1.543 | 1.543 FLJ12816   | abhydrolase domain containing 4                                            |
| AK055367  | 0.00689  | 1.542 | 1.542 MGC9912    | Similar to RIKEN cDNA 4930578F06 gene                                      |
| NM_014033 | 0.0208   | 1.542 | 1.542 DKFZP586A0 | methyltransferase like 7a                                                  |
| NM_004327 | 0.0369   | 1.541 | 1.541 BCR        | Breakpoint cluster region                                                  |
| AK024422  | 0.0109   | 1.539 | 1.539 FLJ23209   | pdz domain containing 7                                                    |
| NM_007326 | 0.000702 | 1.539 | 1.539 DIA1       | Diaphorase (NADH) (cytochrome b-5 reductase)                               |
| NM_015670 | 0.00108  | 1.537 | 1.537 SENP3      | Sentrin/SUMO-specific protease 3                                           |
| NM_033194 | 0.00724  | 1.536 | 1.536 HspB9      | Small heat shock protein B9                                                |
| AL133573  | 0.00535  | 1.535 | 1.535 RHBDL4     | rhomboid, veinlet-like 3 (drosophila)                                      |

|                     |          |       |                 |                                                                             |
|---------------------|----------|-------|-----------------|-----------------------------------------------------------------------------|
| NM_014715           | 0.0322   | 1.534 | 1.534 KIAA0712  | rho gtpase-activating protein                                               |
| AK054774            | 0.011    | 1.532 | 1.532           | t-cell lymphoma breakpoint associated target 1                              |
| AL162053            | 0.0487   | 1.532 | 1.532 FBXO3     | f-box protein 3                                                             |
| NM_000404           | 0.0204   | 1.532 | 1.532 GLB1      | Galactosidase, beta 1                                                       |
| BC010637            | 0.00231  | 1.531 | 1.531 C20orf64  | tp53 regulating kinase                                                      |
| NM_023918           | 0.0477   | 1.531 | 1.531 TAS2R8    | Taste receptor, type 2, member 8                                            |
| AK026759            | 0.000482 | 1.529 | 1.529 LOC143188 | Homo sapiens cDNA: FLJ23106 fis, clone LNG07680                             |
| Z37994              | 0.0412   | 1.528 | 1.528 CTNNA1    | Catenin (cadherin-associated protein), alpha pseudogene 1                   |
| NM_032823           | 0.00175  | 1.526 | 1.526 FLJ14675  | Hypothetical protein FLJ14675                                               |
| AK023824            | 0.0105   | 1.525 | 1.525 KIAA0809  | rad54-like 2 (s. cerevisiae)                                                |
| NM_002860           | 0.0497   | 1.525 | 1.525 PYCS      | Pyrroline-5-carboxylate synthetase (glutamate gamma-semialdehyde synthase)  |
| NM_005438           | 0.0132   | 1.525 | 1.525 FOSL1     | FOS-like antigen 1                                                          |
| NM_003510           | 0.0283   | 1.524 | 1.524 H2AFD     | H2A histone family, member D                                                |
| AB051520            | 0.0105   | 1.523 | 1.523 KIAA1733  | KIAA1733 protein                                                            |
| NM_012373           | 0.0359   | 1.523 | 1.523 OR3A3     | Olfactory receptor, family 3, subfamily A, member 3                         |
| AB023210            | 0.0095   | 1.521 | 1.521 KIAA0993  | wd repeat and fyve domain containing 3                                      |
| NM_006426           | 0.0239   | 1.521 | 1.521 DPYSL4    | Dihydropyrimidinase-like 4                                                  |
| NM_005679           | 0.0172   | 1.52  | 1.52 TAF1C      | TATA box binding protein (TBP)-associated factor, RNA polymerase I, C, 1    |
| NM_032412           | 0.0188   | 1.519 | 1.519 ORF1-FL49 | Putative nuclear protein ORF1-FL49                                          |
| AB028978            | 0.0332   | 1.518 | 1.518 KIAA1055  | tbc1 domain family member 2b                                                |
| NM_003614           | 0.0395   | 1.517 | 1.517 GALR3     | Galanin receptor 3                                                          |
| NM_004122           | 0.0226   | 1.517 | 1.517 GHSR      | Growth hormone secretagogue receptor                                        |
| NM_017429           | 0.0234   | 1.514 | 1.514 BCDO      | Beta-carotene 15, 15'-dioxygenase                                           |
| NM_052887           | 0.0138   | 1.513 | 1.513 TIRAP     | Toll-interleukin 1 receptor (TIR) domain-containing adapter protein         |
| NM_021728           | 0.0332   | 1.511 | 1.511 OTX2      | Orthodenticle homolog 2 (Drosophila)                                        |
| NM_021934           | 0.0393   | 1.511 | 1.511 FLJ11773  | Hypothetical protein FLJ11773                                               |
| AK055711            | 0.0014   | 1.51  | 1.51 SFXN2      | sideroflexin 2                                                              |
| AK022110            | 0.0196   | 1.509 | 1.509           | nudix (nucleoside diphosphate linked moiety x)-type motif 4                 |
| AB014562            | 0.0228   | 1.505 | 1.505 KIAA0662  | phd finger protein 2                                                        |
| NM_052961           | 0.0131   | 1.505 | 1.505 SLC26A8   | Solute carrier family 26, member 8                                          |
| AK027242, NM_000772 | 0.0134   | 1.504 | 1.504           | amyloid beta (a4) precursor protein (peptidase nexin-ii, alzheimer disease) |
| NM_000772           | 0.00836  | 1.503 | 1.503 CYP2C18   | Cytochrome P450, subfamily IIC (mephenytoin 4-hydroxylase), polypeptide     |
| NM_016564           | 0.0104   | 1.5   | 1.5 BM88        | BM88 antigen                                                                |
| NM_006336           | 0.0313   | 1.499 | 1.499 ZYG       | ZYG homolog                                                                 |
| NM_021977           | 0.0344   | 1.498 | 1.498 SLC22A3   | Solute carrier family 22 (extraneuronal monoamine transporter), member 3    |
| AB011157            | 0.0183   | 1.497 | 1.497 KIAA0585  | Phosphatidylserine receptor                                                 |
| AK023825            | 0.049    | 1.497 | 1.497 C21orf91  | Chromosome 21 open reading frame 91                                         |

|           |          |       |                  |                                                                       |
|-----------|----------|-------|------------------|-----------------------------------------------------------------------|
| NM_012319 | 0.0221   | 1.497 | 1.497 LIV-1      | LIV-1 protein, estrogen regulated                                     |
| BC004925  | 0.0422   | 1.496 | 1.496 GPRC5C     | g protein-coupled receptor, family c, group 5, member c               |
| NM_002046 | 0.00151  | 1.496 | 1.496 GAPD       | Glyceraldehyde-3-phosphate dehydrogenase                              |
| NM_016645 | 0.00332  | 1.496 | 1.496 NEUGRIN    | Mesenchymal stem cell protein DSC92                                   |
| NM_022897 | 0.037    | 1.494 | 1.494 RANBP17    | RAN binding protein 17                                                |
| NM_003433 | 0.0265   | 1.493 | 1.493 ZNF132     | Zinc finger protein 132 (clone pHZ-12)                                |
| NM_006076 | 0.00224  | 1.491 | 1.491 RAB-R      | Rev/Rex activation domain binding protein-related                     |
| AB058781  | 0.0499   | 1.49  | 1.49 KIAA1878    | microtubule associated protein 6                                      |
| NM_145263 | 0.0171   | 1.489 | 1.489 ENSG000001 | LOC132671. [Source:RefSeq;Acc:NM_145263]                              |
| AK025636  | 0.00271  | 1.488 | 1.488 ANKRD15    | ankyrin repeat domain 15                                              |
| AK056154  | 0.0224   | 1.488 | 1.488            | Homo sapiens cDNA FLJ31592 fis, clone NT2RI2002447                    |
| NM_030974 | 0.0148   | 1.488 | 1.488 DKFZP434N1 | shank-associated rh domain interactor                                 |
| BC000085  | 0.00908  | 1.484 | 1.484 RPS15      | Ribosomal protein S15                                                 |
| NM_006302 | 0.0377   | 1.483 | 1.483 GCS1       | Glucosidase I                                                         |
| AK000782  | 0.0471   | 1.482 | 1.482 ARGBP2     | sorbin and sh3 domain containing 2                                    |
| NM_000835 | 0.00277  | 1.48  | 1.48 GRIN2C      | Glutamate receptor, ionotropic, N-methyl D-aspartate 2C               |
| Y11142    | 0.00895  | 1.48  | 1.48 EAN57       | Hypothetical protein                                                  |
| AK056859  | 0.0312   | 1.478 | 1.478 RAR2A      | SOCS box containing protein RAR2A                                     |
| NM_001306 | 0.00708  | 1.478 | 1.478 CLDN3      | Claudin 3                                                             |
| NM_024085 | 0.00148  | 1.478 | 1.478 FLJ22169   | atg9 autophagy related 9 homolog a (s. cerevisiae)                    |
| NM_033118 | 0.0027   | 1.477 | 1.477 MYLK2      | Myosin light chain kinase 2, skeletal muscle                          |
| NM_024758 | 0.0311   | 1.476 | 1.476 FLJ23384   | Agmatinase                                                            |
| AK025181  | 0.0214   | 1.475 | 1.475 LOC91464   | rax-like homeobox                                                     |
| NM_014356 | 0.00489  | 1.475 | 1.475 HGC6.2     | HGC6.2 protein                                                        |
| AL050137  | 0.0313   | 1.474 | 1.474 DKFZP586L1 | olfactomedin-like 2b                                                  |
| AF229803  | 0.0169   | 1.473 | 1.473            | Homo sapiens endozepine-like protein type 1 mutant mRNA, complete cds |
| NM_001749 | 0.0168   | 1.472 | 1.472 CAPNS1     | Calpain, small subunit 1                                              |
| AK054814  | 0.0378   | 1.471 | 1.471 MEIS3      | Meis1, myeloid ecotropic viral integration site 1 homolog 3 (mouse)   |
| NM_001273 | 0.0128   | 1.47  | 1.47 CHD4        | Chromodomain helicase DNA binding protein 4                           |
| NM_032410 | 0.0242   | 1.469 | 1.469 HOOK3      | Hook3 protein                                                         |
| NM_006458 | 0.0201   | 1.467 | 1.467 TRIM3      | Tripartite motif-containing 3                                         |
| NM_004455 | 0.00298  | 1.466 | 1.466 EXTL1      | Exostoses (multiple)-like 1                                           |
| AK026710  | 0.0391   | 1.465 | 1.465 KIAA1228   | family with sequence similarity 62 (c2 domain containing) member b    |
| NM_002541 | 0.0104   | 1.465 | 1.465 OGDH       | Oxoglutarate (alpha-ketoglutarate) dehydrogenase (lipoamide)          |
| NM_004031 | 0.0173   | 1.465 | 1.465 IRF7       | Interferon regulatory factor 7                                        |
| AK057278  | 0.00121  | 1.462 | 1.462 CNTN4      | Contactin 4                                                           |
| NM_001255 | 0.000991 | 1.46  | 1.46 CDC20       | CDC20 cell division cycle 20 homolog (S. cerevisiae)                  |

|           |          |       |                   |                                                                             |
|-----------|----------|-------|-------------------|-----------------------------------------------------------------------------|
| NM_005828 | 0.0138   | 1.459 | 1.459 HAN11       | WD-repeat protein                                                           |
| NM_022836 | 0.0018   | 1.459 | 1.459 DCLRE1B     | DNA cross-link repair 1B (PSO2 homolog, <i>S. cerevisiae</i> )              |
| AB046833  | 0.0215   | 1.458 | 1.458 KIAA1613    | solute carrier family 7 (cationic amino acid transporter, y+ system, member |
| NM_032039 | 0.0122   | 1.458 | 1.458 DKFZP761DC  | chromosome 16 open reading frame 9                                          |
| NM_000237 | 0.0226   | 1.457 | 1.457 LPL         | Lipoprotein lipase                                                          |
| NM_014021 | 0.00451  | 1.457 | 1.457 KIAA0923    | KIAA0923 protein                                                            |
| NM_024095 | 0.0423   | 1.457 | 1.457 MGC5540     | ankyrin repeat and socs box-containing 8                                    |
| AK055229  | 0.00997  | 1.456 | 1.456 GPR12       | g protein-coupled receptor 12                                               |
| NM_001760 | 0.00539  | 1.456 | 1.456 CCND3       | Cyclin D3                                                                   |
| NM_004433 | 0.02     | 1.456 | 1.456 ELF3        | E74-like factor 3 (ets domain transcription factor, epithelial-specific )   |
| AK024492  | 0.0121   | 1.455 | 1.455 MGC2555     | zinc finger protein 503                                                     |
| BE884686  | 0.00522  | 1.454 | 1.454 LTB4DH      | ESTs, Highly similar to LB4D_HUMAN NADP-DEPENDENT LEUKOTRIEN                |
| NM_004315 | 0.00821  | 1.454 | 1.454 ASAH        | N-acylsphingosine amidohydrolase (acid ceramidase)                          |
| NM_022740 | 0.0277   | 1.453 | 1.453 HIPK2       | Homeodomain interacting protein kinase 2                                    |
| NM_005154 | 0.0344   | 1.45  | 1.45 USP8         | Ubiquitin specific protease 8                                               |
| NM_018447 | 0.00829  | 1.45  | 1.45 LOC55831     | 30 kDa protein                                                              |
| NM_053043 | 0.00146  | 1.448 | 1.448 MGC20460    | proline rich 8                                                              |
| AK025953  | 0.0426   | 1.447 | 1.447             | myosin, light polypeptide kinase                                            |
| NM_012122 | 0.034    | 1.444 | 1.444 CES3        | Carboxylesterase 3 (brain)                                                  |
| BE379813  | 0.00157  | 1.443 | 1.443 LOC55864    | Uncharacterized gastric protein YC11P                                       |
| AK021608  | 0.0253   | 1.441 | 1.441 FLJ22405    | chromosome 3 open reading frame 29                                          |
| BC008248  | 0.0239   | 1.441 | 1.441             | Homo sapiens, clone IMAGE:3874689, mRNA, partial cds                        |
| NM_004229 | 0.0165   | 1.441 | 1.441 CRSP2       | Cofactor required for Sp1 transcriptional activation, subunit 2 (150kD)     |
| NM_020657 | 0.00299  | 1.441 | 1.441 ZNF304      | Zinc finger protein 304                                                     |
| NM_014977 | 0.000566 | 1.44  | 1.44 KIAA0670     | apoptotic chromatin condensation inducer 1                                  |
| NM_018373 | 0.0365   | 1.44  | 1.44 FLJ11271     | synaptojanin 2 binding protein                                              |
| NM_024779 | 0.0029   | 1.44  | 1.44 FLJ22055     | phosphatidylinositol-4-phosphate 5-kinase, type ii, gamma                   |
| NM_032507 | 0.0437   | 1.439 | 1.439 HUCEP-4     | Cerebral protein-4                                                          |
| NM_021081 | 0.0372   | 1.438 | 1.438 GHRH        | Growth hormone releasing hormone                                            |
| AF234255  | 0.0327   | 1.437 | 1.437 IGLJ3       | Homo sapiens clone KM36 immunoglobulin light chain variable region mRN      |
| NM_003019 | 0.0102   | 1.437 | 1.437 SFTPD       | Surfactant, pulmonary-associated protein D                                  |
| AK026652  | 0.00662  | 1.436 | 1.436 hPAD-colony | Peptidylarginine deiminase type I                                           |
| BC011864  | 0.00878  | 1.436 | 1.436 MYCL1       | v-myc myelocytomatosis viral oncogene homolog 1, lung carcinoma derivec     |
| NM_005471 | 0.0457   | 1.436 | 1.436 GNPI        | Glucosamine-6-phosphate isomerase                                           |
| NM_032346 | 0.00463  | 1.435 | 1.435 MGC13096    | Hypothetical protein MGC13096                                               |
| U53442    | 0.0309   | 1.434 | 1.434 MAPK11      | Mitogen-activated protein kinase 11                                         |
| AK055312  | 0.00237  | 1.432 | 1.432 STRN4       | striatin, calmodulin binding protein 4                                      |



|           |         |       |                  |                                                                              |
|-----------|---------|-------|------------------|------------------------------------------------------------------------------|
| AB033066  | 0.0407  | 1.431 | 1.431 KIAA1240   | KIAA1240 protein                                                             |
| AB069698  | 0.00571 | 1.431 | 1.431 ADAMTS13   | A disintegrin-like and metalloprotease (reprolysin type) with thrombospondin |
| NM_032566 | 0.00492 | 1.431 | 1.431 ECG2       | Esophagus cancer-related gene-2                                              |
| BC010642  | 0.00306 | 1.43  | 1.43 ZNF22       | Zinc finger protein 22 (KOX 15)                                              |
| NM_001501 | 0.0116  | 1.429 | 1.429 GNRH2      | Gonadotropin-releasing hormone 2                                             |
| NM_006195 | 0.0115  | 1.427 | 1.427 PBX3       | Pre-B-cell leukemia transcription factor 3                                   |
| AB046773  | 0.00149 | 1.426 | 1.426 KIAA1553   | KIAA1553 protein                                                             |
| AK000803  | 0.0487  | 1.426 | 1.426 LOC90624   | Homo sapiens cDNA FLJ20796 fis, clone COL00301                               |
| BC011693  | 0.0135  | 1.425 | 1.425 LOC169611  | olfactomedin-like 2a                                                         |
| NM_020147 | 0.00174 | 1.425 | 1.425 LOC56906   | thap domain containing 10                                                    |
| AK000795  | 0.0177  | 1.424 | 1.424            | phosphodiesterase 3a, cgmp-inhibited                                         |
| AK057021  | 0.0094  | 1.424 | 1.424 MGC5139    | Hypothetical protein MGC5139                                                 |
| AL353933  | 0.0116  | 1.424 | 1.424 DKFZp761G0 | solute carrier family 22 (organic cation transporter), member 15             |
| NM_031897 | 0.0073  | 1.424 | 1.424 CACNG6     | Calcium channel, voltage-dependent, gamma subunit 6                          |
| AF333077  | 0.00189 | 1.423 | 1.423 FKSG39     | Homo sapiens FKSG39 (FKSG39) mRNA, complete cds                              |
| NM_001415 | 0.0186  | 1.423 | 1.423 EIF2S3     | Eukaryotic translation initiation factor 2, subunit 3 (gamma, 52kD)          |
| NM_014009 | 0.00136 | 1.422 | 1.422 IPEX       | Immune dysregulation, polyendocrinopathy, enteropathy, X-linked              |
| NM_022338 | 0.00964 | 1.422 | 1.422 C11orf24   | Chromosome 11 open reading frame 24                                          |
| NM_019089 | 0.0277  | 1.421 | 1.421 HES2       | Hairy and enhancer of split (Drosophila) homolog 2                           |
| AK054580  | 0.00611 | 1.42  | 1.42 FBXW2       | f-box and wd-40 domain protein 2                                             |
| AK056666  | 0.0412  | 1.42  | 1.42 ZNF488      | zinc finger protein 488                                                      |
| NM_006865 | 0.0057  | 1.42  | 1.42 LILRA3      | Leukocyte immunoglobulin-like receptor, subfamily A (without TM domain),     |
| NM_030936 | 0.0126  | 1.42  | 1.42 DKFZP434C1  | Hypothetical protein DKFZp434C135                                            |
| NM_002861 | 0.0152  | 1.419 | 1.419 PCYT2      | Phosphate cytidyltransferase 2, ethanolamine                                 |
| NM_020179 | 0.0278  | 1.419 | 1.419 FN5        | FN5 protein                                                                  |
| NM_022471 | 0.0229  | 1.419 | 1.419 FLJ13057   | germ cell-less homolog 1 (drosophila)-like                                   |
| NM_033128 | 0.0435  | 1.419 | 1.419 SCIN       | Scinderin                                                                    |
| AK056562  | 0.0188  | 1.416 | 1.416 EBNA1BP2   | EBNA1 binding protein 2                                                      |
| AK056751  | 0.0194  | 1.416 | 1.416 MGC20446   | cytochrome b, ascorbate dependent 3                                          |
| NM_033297 | 0.018   | 1.413 | 1.413 RNO2       | Leucine-rich-repeat protein                                                  |
| NM_001824 | 0.00154 | 1.412 | 1.412 CKM        | Creatine kinase, muscle                                                      |
| NM_004827 | 0.0354  | 1.412 | 1.412 ABCG2      | ATP-binding cassette, sub-family G (WHITE), member 2                         |
| NM_016161 | 0.0454  | 1.412 | 1.412 LOC51146   | Alpha-1,4-N-acetylglucosaminyltransferase                                    |
| NM_006227 | 0.00613 | 1.411 | 1.411 PLTP       | Phospholipid transfer protein                                                |
| AK056372  | 0.0411  | 1.409 | 1.409 FLJ31810   | leucine rich repeat neuronal 6c                                              |
| AL121980  | 0.0218  | 1.409 | 1.409            | high-mobility group box 4                                                    |
| AL133632  | 0.0485  | 1.409 | 1.409 DKFZp434E1 | similar to hypothetical protein                                              |

|           |          |       |                         |                                                                                |
|-----------|----------|-------|-------------------------|--------------------------------------------------------------------------------|
| NM_000704 | 0.0229   | 1.409 | 1.409 ATP4A             | ATPase, H+/K+ exchanging, alpha polypeptide                                    |
| AJ132194  | 0.0235   | 1.408 | 1.408 OR2N1P            | Olfactory receptor, family 2, subfamily N, member 1 pseudogene                 |
| NM_001384 | 0.0031   | 1.408 | 1.408 DPH2L2            | Diphtheria toxin resistance protein required for diphthamide biosynthesis-like |
| NM_014621 | 0.0243   | 1.408 | 1.408 HOXD4             | Homeo box D4                                                                   |
| AB037826  | 0.0194   | 1.407 | 1.407 KIAA1405          | kinesin family member 17                                                       |
| NM_031918 | 0.017    | 1.407 | 1.407 KLF16             | Kruppel-like factor 16                                                         |
| BC015904  | 0.042    | 1.405 | 1.405 MRPL10            | Mitochondrial ribosomal protein L10                                            |
| NM_016188 | 0.0123   | 1.405 | 1.405 ACTL6             | Actin-like 6                                                                   |
| NM_024956 | 0.0493   | 1.404 | 1.404 FLJ23375          | transmembrane protein 62                                                       |
| NM_012480 | 0.0475   | 1.403 | 1.403 ZNF73             | Zinc finger protein 73 (Cos12)                                                 |
| NM_014617 | 0.0067   | 1.403 | 1.403 CRYGA             | Crystallin, gamma A                                                            |
| AJ420467  | 0.00273  | 1.401 | 1.401 PAPP              | pregnancy-associated plasma protein a, pappalysin 1                            |
| NM_022375 | 0.00654  | 1.401 | 1.401 OCLM              | Oculomedin                                                                     |
| AK056596  | 0.0325   | 0.714 | -1.400560224 ZFP90      | zinc finger protein 90 homolog (mouse)                                         |
| D28588    | 0.00848  | 0.714 | -1.400560224 SP2        | Sp2 transcription factor                                                       |
| NM_017914 | 0.0177   | 0.708 | -1.412429379 FLJ20640   | Hypothetical protein FLJ20640                                                  |
| NM_004904 | 0.0106   | 0.707 | -1.414427157 H_GS165L15 | CAMP response element-binding protein CRE-BPa                                  |
| AF332558  | 0.000709 | 0.706 | -1.416430595 BBC3       | Bcl-2 binding component 3                                                      |
| BC009627  | 0.038    | 0.706 | -1.416430595 PYM        | within bgcn homolog (drosophila)                                               |
| AL049998  | 0.0175   | 0.705 | -1.418439716 PIK3C2A    | phosphoinositide-3-kinase, class 2, alpha polypeptide                          |
| AK057668  | 0.042    | 0.703 | -1.422475107            | aryl hydrocarbon receptor                                                      |
| NM_015626 | 0.00646  | 0.703 | -1.422475107 WSB1       | SOCS box-containing WD protein SWiP-1                                          |
| NM_145040 | 0.00932  | 0.7   | -1.428571429 ENSG000001 | PROTEIN KINASE C, DELTA BINDING PROTEIN. [Source:RefSeq;Acc:NM                 |
| AK055219  | 0.0329   | 0.699 | -1.430615165 LOC148137  | Homo sapiens cDNA FLJ30657 fis, clone DFNES2000335                             |
| NM_005998 | 0.00726  | 0.698 | -1.432664756 CCT3       | Chaperonin containing TCP1, subunit 3 (gamma)                                  |
| AK055198  | 0.0178   | 0.696 | -1.436781609 LOC286075  | zinc finger protein 707                                                        |
| NM_022903 | 0.0486   | 0.696 | -1.436781609 FLJ12800   | Hypothetical protein FLJ12800                                                  |
| AK056809  | 0.0324   | 0.695 | -1.438848921 LOC116064  | leucine rich repeat containing 58                                              |
| AL353946  | 0.0453   | 0.694 | -1.44092219             | hypothetical protein dkfzp761i2114                                             |
| AK057062  | 0.0315   | 0.692 | -1.445086705 BID        | bh3 interacting domain death agonist                                           |
| BC011630  | 0.00515  | 0.692 | -1.445086705 LOC170394  | pwwp domain containing 2                                                       |
| NM_001383 | 0.0348   | 0.692 | -1.445086705 DPH2L1     | Diphtheria toxin resistance protein required for diphthamide biosynthesis-like |
| NM_004186 | 0.0121   | 0.691 | -1.447178003 SEMA3F     | Sema domain, immunoglobulin domain (Ig), short basic domain, secreted, (       |
| NM_017971 | 0.0382   | 0.691 | -1.447178003 MRPL20     | Mitochondrial ribosomal protein L20                                            |
| NM_000363 | 0.0281   | 0.69  | -1.449275362 TNNI3      | Troponin I, cardiac                                                            |
| NM_001374 | 0.0108   | 0.69  | -1.449275362 DNASE1L2   | Deoxyribonuclease I-like 2                                                     |
| AL137312  | 0.0355   | 0.688 | -1.453488372 ACP33      | spastic paraplegia 21 (autosomal recessive, mast syndrome)                     |

|           |          |       |              |          |                                                      |
|-----------|----------|-------|--------------|----------|------------------------------------------------------|
| NM_000805 | 0.0115   | 0.687 | -1.455604076 | GAS      | Gastrin                                              |
| NM_005442 | 0.0479   | 0.687 | -1.455604076 | EOMES    | Eomesodermin homolog (Xenopus laevis)                |
| NM_018896 | 0.00181  | 0.685 | -1.459854015 | CACNA1G  | Calcium channel, voltage-dependent, alpha 1G subunit |
| AK024514  | 0.00855  | 0.683 | -1.464128843 | JJAZ1    | suppressor of zeste 12 homolog (drosophila)          |
| NM_005386 | 0.000492 | 0.683 | -1.464128843 | NNAT     | Neuronatin                                           |
| Y10183    | 0.00643  | 0.682 | -1.46627566  | ALCAM    | Activated leucocyte cell adhesion molecule           |
| AK055864  | 0.0101   | 0.681 | -1.468428781 | HSD-3.1  | spermatogenesis associated 7                         |
| NM_025080 | 0.000531 | 0.681 | -1.468428781 | FLJ22316 | asparaginase like 1                                  |
| AB011106  | 0.0295   | 0.679 | -1.47275405  | KIAA0534 | attractin-like 1                                     |
| NM_014788 | 0.0118   | 0.679 | -1.47275405  | TRIM14   | Tripartite motif-containing 14                       |
| NM_002947 | 0.0203   | 0.678 | -1.474926254 | RPA3     | Replication protein A3 (14kD)                        |
| NM_015629 | 0.0163   | 0.678 | -1.474926254 | PRPF31   | PRP31 pre-mRNA processing factor 31 homolog (yeast)  |
| BC011028  | 0.0282   | 0.677 | -1.477104874 | TBX5     | t-box 5                                              |
| AK058144  | 0.0428   | 0.674 | -1.483679525 | FLJ25415 | Homo sapiens cDNA FLJ25415 fis, clone TST03443       |
| NM_053276 | 0.028    | 0.674 | -1.483679525 | VIT      | Homo sapiens vitrin (VIT), mRNA                      |
| D63480    | 0.00393  | 0.673 | -1.485884101 | KIAA0146 | KIAA0146 protein                                     |
| NM_003104 | 0.0103   | 0.672 | -1.488095238 | SORD     | Sorbitol dehydrogenase                               |
| NM_024570 | 0.013    | 0.672 | -1.488095238 | FLJ11712 | deleted in leukemia 8 protein                        |
| NM_002948 | 0.0196   | 0.671 | -1.490312966 | RPL15    | Ribosomal protein L15                                |
| AL117234  | 0.0331   | 0.67  | -1.492537313 | MCF2     | MCF.2 cell line derived transforming sequence        |
| D30612    | 0.0395   | 0.668 | -1.497005988 | ZNF282   | Zinc finger protein 282                              |
| NM_006666 | 0.0143   | 0.668 | -1.497005988 | RUVBL2   | RuvB-like 2 (E. coli)                                |
| AB011180  | 0.0211   | 0.667 | -1.499250375 | KIAA0608 | tbc1 domain family member 12                         |
| AF247704  | 0.0389   | 0.667 | -1.499250375 | NKX3A    | NK3 transcription factor homolog A (Drosophila)      |
| AK058098  | 0.0176   | 0.666 | -1.501501502 | FLJ25369 | Homo sapiens cDNA FLJ25369 fis, clone TST01830       |
| BC009491  | 0.0381   | 0.664 | -1.506024096 | KIF1A    | kinesin family member 1a                             |
| NM_001750 | 0.0239   | 0.657 | -1.522070015 | CAST     | Calpastatin                                          |
| NM_019100 | 0.0317   | 0.654 | -1.529051988 | DMAP1    | DNA methyltransferase 1-associated protein 1         |
| NM_002268 | 0.0487   | 0.653 | -1.531393568 | KPNA4    | Karyopherin alpha 4 (importin alpha 3)               |
| NM_006236 | 0.0356   | 0.653 | -1.531393568 | POU3F3   | POU domain, class 3, transcription factor 3          |
| NM_017987 | 0.0165   | 0.653 | -1.531393568 | Rabip4R  | Run- and FYVE-domain containing protein              |
| NM_024512 | 0.00777  | 0.653 | -1.531393568 | LRRC2    | Leucine-rich repeat-containing 2                     |
| BC018028  | 0.0189   | 0.651 | -1.53609831  | MDS009   | dtw domain containing 1                              |
| AB002363  | 0.0478   | 0.65  | -1.538461538 | KIAA0365 | KIAA0365 gene product                                |
| NM_022568 | 0.0353   | 0.645 | -1.550387597 | ALDH8A1  | Aldehyde dehydrogenase 8 family, member A1           |
| NM_002453 | 0.0105   | 0.643 | -1.555209953 | MTIF2    | Mitochondrial translational initiation factor 2      |
| NM_001977 | 0.0217   | 0.642 | -1.557632399 | ENPEP    | Glutamyl aminopeptidase (aminopeptidase A)           |

|           |          |       |              |             |                                                                                |
|-----------|----------|-------|--------------|-------------|--------------------------------------------------------------------------------|
| NM_005558 | 0.00498  | 0.641 | -1.560062402 | LAD1        | Ladinin 1                                                                      |
| NM_007171 | 0.0141   | 0.641 | -1.560062402 | POMT1       | Protein-O-mannosyltransferase 1                                                |
| NM_002964 | 0.036    | 0.64  | -1.5625      | S100A8      | S100 calcium binding protein A8 (calgranulin A)                                |
| BG535392  | 0.0446   | 0.639 | -1.564945227 | IGKV1-13    | Immunoglobulin kappa variable 1-13                                             |
| AF174394  | 0.0259   | 0.638 | -1.567398119 |             | apoptotoc-related protein pcar                                                 |
| NM_024423 | 0.0179   | 0.638 | -1.567398119 | DSC3        | Desmocollin 3                                                                  |
| NM_007373 | 0.0437   | 0.637 | -1.569858713 | SHOC2       | Soc-2 suppressor of clear homolog (C. elegans)                                 |
| NM_170783 | 0.00799  | 0.637 | -1.569858713 | ENSG000000  | ZINC RIBBON DOMAIN CONTAINING, 1; TRANSCRIPTION-ASSOCIATE                      |
| NM_000971 | 0.000951 | 0.636 | -1.572327044 | RPL7        | Ribosomal protein L7                                                           |
| NM_018075 | 0.039    | 0.636 | -1.572327044 | FLJ10375    | transmembrane protein 16k                                                      |
| NM_000748 | 0.0011   | 0.635 | -1.57480315  | CHRNB2      | Cholinergic receptor, nicotinic, beta polypeptide 2 (neuronal)                 |
| NM_004379 | 0.0351   | 0.635 | -1.57480315  | CREB1       | CAMP responsive element binding protein 1                                      |
| U63332    | 0.0282   | 0.634 | -1.577287066 |             | Human super cysteine rich protein mRNA, partial cds                            |
| NM_139281 | 0.0475   | 0.633 | -1.579778831 | TA-WDRP     | T-CELL ACTIVATION WD REPEAT PROTEIN; SIMILAR TO SD06427P. [S                   |
| NM_004131 | 0.00435  | 0.632 | -1.582278481 | GZMB        | Granzyme B (granzyme 2, cytotoxic T-lymphocyte-associated serine estera        |
| AK027135  | 0.0121   | 0.627 | -1.594896332 | LOC283970   | Homo sapiens cDNA: FLJ23482 fis, clone KAIA03142                               |
| NM_003021 | 0.0382   | 0.627 | -1.594896332 | SGT         | Small glutamine-rich tetratricopeptide repeat (TPR)-containing                 |
| NM_000121 | 0.0197   | 0.626 | -1.597444089 | EPOR        | Erythropoietin receptor                                                        |
| AK057913  | 0.039    | 0.622 | -1.607717042 | USP54       | Homo sapiens cDNA FLJ25184 fis, clone CBR09423                                 |
| NM_006739 | 0.013    | 0.621 | -1.610305958 | MCM5        | MCM5 minichromosome maintenance deficient 5, cell division cycle 46 (S. c      |
| NM_001735 | 0.0303   | 0.619 | -1.615508885 | C5          | Complement component 5                                                         |
| NM_003860 | 0.046    | 0.618 | -1.618122977 | BCRP1       | Breakpoint cluster region protein, uterine leiomyoma, 1; barrier to autointegi |
| AK002036  | 0.0293   | 0.617 | -1.620745543 |             | torsin a interacting protein 2                                                 |
| NM_003574 | 0.00416  | 0.616 | -1.623376623 | VAPA        | VAMP (vesicle-associated membrane protein)-associated protein A (33kD)         |
| AL137551  | 0.00245  | 0.615 | -1.62601626  | C10orf39    | chromosome 10 open reading frame 39                                            |
| NM_004767 | 0.0295   | 0.613 | -1.63132137  | ET(B)R-LP-2 | Endothelin type b receptor-like protein 2                                      |
| NM_005383 | 0.016    | 0.611 | -1.636661211 | NEU2        | Sialidase 2 (cytosolic sialidase)                                              |
| NM_016232 | 0.0208   | 0.61  | -1.639344262 | IL1RL1      | Interleukin 1 receptor-like 1                                                  |
| NM_020999 | 0.0381   | 0.608 | -1.644736842 | NEUROG3     | Neurogenin 3                                                                   |
| AK057684  | 0.0233   | 0.607 | -1.647446458 | SF3B1       | splicing factor 3b, subunit 1, 155kda                                          |
| NM_015456 | 0.0106   | 0.606 | -1.650165017 | DKFZP586B0  | cofactor of brca1                                                              |
| NM_016220 | 0.0158   | 0.606 | -1.650165017 | ZFD25       | Zinc finger protein (ZFD25)                                                    |
| NM_003900 | 0.00755  | 0.604 | -1.655629139 | SQSTM1      | Sequestosome 1                                                                 |
| NM_006024 | 0.0198   | 0.602 | -1.661129568 | TAX1BP1     | Tax1 (human T-cell leukemia virus type I) binding protein 1                    |
| BC004930  | 0.0104   | 0.601 | -1.663893511 | FLJ21941    | zinc finger protein 614                                                        |
| NM_000767 | 0.0175   | 0.601 | -1.663893511 | CYP2B6      | Cytochrome P450, subfamily IIB (phenobarbital-inducible), polypeptide 6        |
| NM_004727 | 0.00106  | 0.6   | -1.666666667 | SLC24A1     | Solute carrier family 24 (sodium/potassium/calcium exchanger), member 1        |

|           |          |       |              |           |                                                                           |
|-----------|----------|-------|--------------|-----------|---------------------------------------------------------------------------|
| BC011721  | 0.00552  | 0.598 | -1.672240803 | TUBA2     | Tubulin, alpha 2                                                          |
| NM_005431 | 0.00296  | 0.598 | -1.672240803 | XRCC2     | X-ray repair complementing defective repair in Chinese hamster cells 2    |
| NM_005057 | 0.0142   | 0.597 | -1.675041876 | RBBP5     | Retinoblastoma binding protein 5                                          |
| NM_002335 | 0.0457   | 0.596 | -1.677852349 | LRP5      | Low density lipoprotein receptor-related protein 5                        |
| BC014255  | 0.0241   | 0.593 | -1.686340641 |           | hypothetical protein flj14346                                             |
| NM_007107 | 0.0366   | 0.592 | -1.689189189 | SSR3      | Signal sequence receptor, gamma (translocon-associated protein gamma)     |
| NM_018458 | 0.0325   | 0.59  | -1.694915254 | BM042     | Uncharacterized bone marrow protein BM042                                 |
| NM_006688 | 0.00165  | 0.589 | -1.697792869 | CRF       | C1q-related factor                                                        |
| NM_001934 | 0.0449   | 0.588 | -1.700680272 | DLX4      | Distal-less homeobox 4                                                    |
| AK055809  | 0.00464  | 0.587 | -1.703577513 | LOC148709 | Homo sapiens cDNA FLJ31247 fis, clone KIDNE2005296, weakly similar to     |
| AK054999  | 0.000623 | 0.586 | -1.706484642 |           | Homo sapiens cDNA FLJ30437 fis, clone BRACE2009045                        |
| NM_003811 | 0.0408   | 0.586 | -1.706484642 | TNFSF9    | Tumor necrosis factor (ligand) superfamily, member 9                      |
| NM_023005 | 0.0379   | 0.584 | -1.712328767 | BAZ1B     | Bromodomain adjacent to zinc finger domain, 1B                            |
| NM_003665 | 0.0377   | 0.583 | -1.715265866 | FCN3      | Ficolin (collagen/fibrinogen domain containing) 3 (Hakata antigen)        |
| NM_009587 | 0.0487   | 0.582 | -1.718213058 | LGALS9    | Lectin, galactoside-binding, soluble, 9 (galectin 9)                      |
| AK026902  | 0.00637  | 0.581 | -1.721170396 | GNA13     | guanine nucleotide binding protein (g protein), alpha 13                  |
| AK055476  | 0.00494  | 0.581 | -1.721170396 | ARHGEF7   | rho guanine nucleotide exchange factor (gef) 7                            |
| NM_002031 | 0.0322   | 0.58  | -1.724137931 | FRK       | Fyn-related kinase                                                        |
| NM_001628 | 0.00349  | 0.577 | -1.733102253 | AKR1B1    | Aldo-keto reductase family 1, member B1 (aldose reductase)                |
| NM_006516 | 0.0474   | 0.575 | -1.739130435 | SLC2A1    | Solute carrier family 2 (facilitated glucose transporter), member 1       |
| NM_014751 | 0.0169   | 0.575 | -1.739130435 | KIAA0429  | metastasis suppressor 1                                                   |
| AK055991  | 0.0473   | 0.572 | -1.748251748 | LAMR1     | Laminin receptor 1 (67kD, ribosomal protein SA)                           |
| AB018297  | 0.00226  | 0.571 | -1.751313485 | KIAA0754  | microtubule-actin crosslinking factor 1                                   |
| NM_002952 | 0.0323   | 0.571 | -1.751313485 | RPS2      | Ribosomal protein S2                                                      |
| AK024302  | 0.0121   | 0.57  | -1.754385965 | OCIA      | ocia domain containing 1                                                  |
| NM_012096 | 0.00373  | 0.57  | -1.754385965 | APPL      | Adaptor protein containing pH domain, PTB domain and leucine zipper motif |
| NM_003166 | 0.00498  | 0.567 | -1.76366843  | SULT1A3   | Sulfotransferase family, cytosolic, 1A, phenol-preferring, member 3       |
| AJ237663  | 0.00385  | 0.566 | -1.766784452 | C10orf71  | Homo sapiens ORF1                                                         |
| AL050349  | 0.00578  | 0.566 | -1.766784452 |           | chromatin modifying protein 4b                                            |
| NM_006294 | 0.0324   | 0.564 | -1.773049645 | UQCRB     | Ubiquinol-cytochrome c reductase binding protein                          |
| NM_017823 | 0.013    | 0.562 | -1.779359431 | FLJ20442  | dual specificity phosphatase 23                                           |
| NM_004311 | 0.00474  | 0.56  | -1.785714286 | ARL3      | ADP-ribosylation factor-like 3                                            |
| NM_014750 | 0.0165   | 0.557 | -1.795332136 | KIAA0008  | discs, large homolog 7 (drosophila)                                       |
| NM_004363 | 0.0469   | 0.556 | -1.798561151 | CEACAM5   | Carcinoembryonic antigen-related cell adhesion molecule 5                 |
| AB011137  | 0.00125  | 0.554 | -1.805054152 | KIAA0565  | KIAA0565 gene product                                                     |
| NM_006780 | 0.0293   | 0.554 | -1.805054152 | SMA3      | SMA3                                                                      |
| NM_000394 | 0.0376   | 0.553 | -1.808318264 | CRYAA     | Crystallin, alpha A                                                       |

|           |          |       |              |            |                                                                              |
|-----------|----------|-------|--------------|------------|------------------------------------------------------------------------------|
| AL137663  | 0.0453   | 0.551 | -1.814882033 | PHLDB2     | pleckstrin homology-like domain, family b, member 2                          |
| NM_014754 | 0.0328   | 0.551 | -1.814882033 | PTDSS1     | phosphatidylserine synthase 1                                                |
| NM_006607 | 0.0365   | 0.548 | -1.824817518 | PTTG2      | PITUITARY TUMOR-TRANSFORMING 2. [Source:RefSeq;Acc:NM_006607                 |
| NM_006869 | 0.0338   | 0.547 | -1.828153565 | CENTA1     | Centaurin, alpha 1                                                           |
| AB011128  | 0.0301   | 0.544 | -1.838235294 | KIAA0556   | KIAA0556 protein                                                             |
| NM_022828 | 0.04     | 0.544 | -1.838235294 | FLJ21940   | yth domain containing 2                                                      |
| AK022100  | 0.00264  | 0.542 | -1.84501845  | KIAA0256   | Homo sapiens cDNA FLJ12038 fis, clone HEMBB1001922                           |
| AK056682  | 0.0402   | 0.541 | -1.848428835 |            | chromosome 1 open reading frame 160                                          |
| X83301    | 0.00109  | 0.541 | -1.848428835 | SMA5       | SMA5                                                                         |
| NM_001033 | 0.00125  | 0.537 | -1.862197393 | RRM1       | Ribonucleotide reductase M1 polypeptide                                      |
| NM_000158 | 0.0257   | 0.534 | -1.872659176 | GBE1       | Glucan (1,4-alpha-), branching enzyme 1 (glycogen branching enzyme, Anc      |
| NM_013338 | 0.019    | 0.534 | -1.872659176 | ALG5       | Alg5, S. cerevisiae, homolog of                                              |
| AB058689  | 0.0035   | 0.533 | -1.876172608 | KIAA1786   | KIAA1786 protein                                                             |
| BC013155  | 0.00649  | 0.532 | -1.879699248 | CRYZL1     | crystallin, zeta (quinone reductase)-like 1                                  |
| NM_007350 | 0.000458 | 0.53  | -1.886792453 | ENSG000001 | PLECKSTRIN HOMOLOGY-LIKE DOMAIN, FAMILY A, MEMBER 1; PQ-R                    |
| NM_001428 | 0.00499  | 0.529 | -1.890359168 | ENO1       | Enolase 1, (alpha)                                                           |
| NM_021210 | 0.0357   | 0.529 | -1.890359168 | MUM2       | MUM2 protein                                                                 |
| NM_017512 | 0.0128   | 0.526 | -1.901140684 | HSRTSBETA  | RTS beta protein                                                             |
| AK054575  | 0.04     | 0.524 | -1.908396947 |            | adenosylmethionine decarboxylase 1                                           |
| NM_017711 | 0.0381   | 0.524 | -1.908396947 | FLJ20207   | glycerophosphodiester phosphodiesterase domain containing 2                  |
| NM_017701 | 0.022    | 0.523 | -1.912045889 | ARHGAP8    | Rho GTPase activating protein 8                                              |
| NM_030979 | 0.049    | 0.522 | -1.915708812 | PABPC3     | Poly(A) binding protein, cytoplasmic 3                                       |
| NM_002816 | 0.0411   | 0.521 | -1.919385797 | PSMD12     | Proteasome (prosome, macropain) 26S subunit, non-ATPase, 12                  |
| AB020694  | 0.013    | 0.52  | -1.923076923 | KIAA0887   | ubx domain containing 8                                                      |
| NM_020410 | 0.00112  | 0.52  | -1.923076923 | CGI-152    | atpase type 13a1                                                             |
| NM_003787 | 0.0245   | 0.517 | -1.934235977 | NOL4       | Nucleolar protein 4                                                          |
| NM_014463 | 0.0397   | 0.517 | -1.934235977 | LSM3       | Lsm3 protein                                                                 |
| NM_144963 | 0.00673  | 0.517 | -1.934235977 | ENSG000001 | UNKNOWN                                                                      |
| AK022122  | 0.000165 | 0.515 | -1.941747573 | MTBP       | Mdm2, transformed 3T3 cell double minute 2, p53 binding protein (mouse) l    |
| AK055590  | 0.0161   | 0.515 | -1.941747573 | LOC376693  | Homo sapiens cDNA FLJ31028 fis, clone HLUNG2000570, weakly similar t         |
| NM_014862 | 0.0219   | 0.514 | -1.945525292 | ARNT2      | Aryl-hydrocarbon receptor nuclear translocator 2                             |
| NM_000029 | 0.00684  | 0.512 | -1.953125    | AGT        | Angiotensinogen (serine (or cysteine) proteinase inhibitor, clade A (alpha-1 |
| NM_004134 | 0.01     | 0.511 | -1.956947162 | HSPA9B     | Heat shock 70kD protein 9B (mortalin-2)                                      |
| NM_021074 | 0.00565  | 0.511 | -1.956947162 | NDUFV2     | NADH dehydrogenase (ubiquinone) flavoprotein 2 (24kD)                        |
| NM_005603 | 0.0164   | 0.509 | -1.964636542 | ATP8B1     | ATPase, Class I, type 8B, member 1                                           |
| NM_013291 | 0.0312   | 0.508 | -1.968503937 | CPSF1      | Cleavage and polyadenylation specific factor 1, 160kD subunit                |
| NM_006501 | 0.00231  | 0.506 | -1.976284585 | MOBP       | Myelin-associated oligodendrocyte basic protein                              |

|           |         |       |              |            |                                                                             |
|-----------|---------|-------|--------------|------------|-----------------------------------------------------------------------------|
| BC002828  | 0.0148  | 0.504 | -1.984126984 | HSU84971   | fetal hypothetical protein                                                  |
| NM_032133 | 0.00397 | 0.504 | -1.984126984 | DKFZP434N1 | mycbp associated protein                                                    |
| AK026955  | 0.00256 | 0.503 | -1.988071571 | DKFZp547E0 | rhomboid domain containing 1                                                |
| AK022806  | 0.0182  | 0.501 | -1.996007984 | LOC340281  | Homo sapiens cDNA FLJ31922 fis, clone NT2RP7005219                          |
| AK027745  | 0.0259  | 0.501 | -1.996007984 | WDR21      | wd repeat domain 21a                                                        |
| NM_006089 | 0.00185 | 0.501 | -1.996007984 | SCML2      | Sex comb on midleg-like 2 (Drosophila)                                      |
| NM_018291 | 0.0457  | 0.495 | -2.02020202  | FLJ10986   | hypothetical protein flj10986                                               |
| NM_020665 | 0.0342  | 0.494 | -2.024291498 | NX-17      | Kidney-specific membrane protein                                            |
| NM_015718 | 0.0334  | 0.492 | -2.032520325 | NOX3       | NADPH oxidase 3                                                             |
| NM_021806 | 0.0161  | 0.492 | -2.032520325 |            | 2.19 2.19 gene                                                              |
| NM_001416 | 0.045   | 0.491 | -2.036659878 | EIF4A1     | Eukaryotic translation initiation factor 4A, isoform 1                      |
| NM_015414 | 0.00535 | 0.488 | -2.049180328 | RPL36      | Ribosomal protein L36                                                       |
| AL359591  | 0.0115  | 0.487 | -2.05338809  | DKFZp762O0 | transmembrane protein 55a                                                   |
| NM_024526 | 0.00624 | 0.484 | -2.066115702 | FLJ21522   | eps8-like 3                                                                 |
| AK024172  | 0.00373 | 0.481 | -2.079002079 | UBE2I      | Ubiquitin-conjugating enzyme E2I (UBC9 homolog, yeast)                      |
| NM_030819 | 0.0151  | 0.48  | -2.083333333 | MGC11335   | Hypothetical protein MGC11335                                               |
| NM_017677 | 0.0164  | 0.479 | -2.087682672 | FLJ20126   | myotubularin related protein 8                                              |
| NM_016587 | 0.0416  | 0.475 | -2.105263158 | CBX3       | Chromobox homolog 3 (HP1 gamma homolog, Drosophila)                         |
| NM_000365 | 0.00684 | 0.471 | -2.123142251 | TPI1       | Triosephosphate isomerase 1                                                 |
| NM_005504 | 0.033   | 0.471 | -2.123142251 | BCAT1      | Branched chain aminotransferase 1, cytosolic                                |
| NM_031278 | 0.0345  | 0.47  | -2.127659574 | TDRD1      | Tudor domain containing 1                                                   |
| AF006199  | 0.00878 | 0.468 | -2.136752137 | FLJ90396   | Homo sapiens leukemia susceptibility mRNA, 3' region                        |
| NM_033301 | 0.0103  | 0.463 | -2.159827214 | RPL8       | Ribosomal protein L8                                                        |
| NM_000269 | 0.0357  | 0.461 | -2.169197397 | NME1       | Non-metastatic cells 1, protein (NM23A) expressed in                        |
| NM_014228 | 0.0115  | 0.459 | -2.178649237 | SLC6A7     | Solute carrier family 6 (neurotransmitter transporter, L-proline), member 7 |
| NM_016126 | 0.0338  | 0.459 | -2.178649237 | LOC51668   | HSPCO34 protein                                                             |
| NM_016042 | 0.00438 | 0.457 | -2.188183807 | RRP40      | Exosome component Rrp40                                                     |
| M37712    | 0.00829 | 0.456 | -2.192982456 | CDC2L2     | Cell division cycle 2-like 2                                                |
| NM_005326 | 0.0216  | 0.455 | -2.197802198 | HAGH       | Hydroxyacyl glutathione hydrolase                                           |
| NM_016167 | 0.0238  | 0.454 | -2.202643172 | RARG-1     | Retinoic acid repressible protein                                           |
| NM_024894 | 0.00266 | 0.454 | -2.202643172 | FLJ14075   | nucleolar protein 10                                                        |
| NM_000238 | 0.0393  | 0.452 | -2.212389381 | KCNH2      | Potassium voltage-gated channel, subfamily H (eag-related), member 2        |
| NM_000988 | 0.0107  | 0.452 | -2.212389381 | RPL27      | Ribosomal protein L27                                                       |
| AK024871  | 0.0139  | 0.45  | -2.222222222 | APBB2      | amyloid beta (a4) precursor protein-binding, family b, member 2 (fe65-like) |
| BC006279  | 0.0251  | 0.449 | -2.227171492 | LOC199692  | zinc finger protein 627                                                     |
| NM_031432 | 0.0122  | 0.448 | -2.232142857 | UCK1       | Uridine-cytidine kinase 1                                                   |
| AK000637  | 0.0259  | 0.447 | -2.237136465 | HSPC043    | chromosome 9 open reading frame 71                                          |

|           |          |       |              |               |                                                                       |
|-----------|----------|-------|--------------|---------------|-----------------------------------------------------------------------|
| NM_001090 | 0.000972 | 0.447 | -2.237136465 | ABCF1         | ATP-binding cassette, sub-family F (GCN20), member 1                  |
| NM_152398 | 0.0122   | 0.447 | -2.237136465 | MGC45416      | SIMILAR TO EVIDENCE:NAS                                               |
| AK026914  | 0.000611 | 0.444 | -2.252252252 |               | snf1-like kinase 2                                                    |
| NM_000992 | 0.0117   | 0.439 | -2.277904328 | RPL29         | Ribosomal protein L29                                                 |
| BC012928  | 0.0104   | 0.435 | -2.298850575 | C6orf150      | chromosome 6 open reading frame 150                                   |
| AK022023  | 0.000392 | 0.433 | -2.309468822 | KIAA0889      | Homo sapiens cDNA FLJ11961 fis, clone HEMBB1001020, highly similar to |
| NM_032351 | 0.00245  | 0.43  | -2.325581395 | MRPL45        | Mitochondrial ribosomal protein L45                                   |
| AK025943  | 0.00215  | 0.429 | -2.331002331 | KIAA2002      | Homo sapiens cDNA: FLJ22290 fis, clone HRC04405                       |
| AK055254  | 0.0132   | 0.427 | -2.341920375 |               | Homo sapiens cDNA FLJ30692 fis, clone FCBBF2000677                    |
| NM_032385 | 0.00831  | 0.427 | -2.341920375 | C5orf4        | Chromosome 5 open reading frame 4                                     |
| NM_000999 | 0.00529  | 0.424 | -2.358490566 | RPL38         | Ribosomal protein L38                                                 |
| NM_006457 | 0.000669 | 0.422 | -2.369668246 | LIM           | LIM protein (similar to rat protein kinase C-binding enigma)          |
| NM_017493 | 0.0286   | 0.421 | -2.375296912 | HSN1          | Hin-1                                                                 |
| NM_014300 | 0.00643  | 0.42  | -2.380952381 | SPC18         | Signal peptidase complex (18kD)                                       |
| NM_013264 | 0.0026   | 0.419 | -2.386634845 | GRTH          | Gonadotropin-regulated testicular RNA helicase                        |
| NM_021094 | 0.0379   | 0.415 | -2.409638554 | SLC21A3       | Solute carrier family 21 (organic anion transporter), member 3        |
| BC016509  | 0.0183   | 0.414 | -2.415458937 | SCAMP-4       | Secretory carrier membrane protein 4                                  |
| BC009980  | 0.00245  | 0.408 | -2.450980392 | LOC113730     | kelch domain containing 7b                                            |
| AL080220  | 0.0159   | 0.407 | -2.457002457 | DKFZP586P0123 | DKFZP586P0123 protein                                                 |
| NM_000405 | 0.0279   | 0.406 | -2.463054187 | GM2A          | GM2 ganglioside activator protein                                     |
| NM_003217 | 0.00496  | 0.406 | -2.463054187 | TEGT          | Testis enhanced gene transcript (BAX inhibitor 1)                     |
| NM_004939 | 0.0451   | 0.404 | -2.475247525 | DDX1          | DEAD/H (Asp-Glu-Ala-Asp/His) box polypeptide 1                        |
| NM_005859 | 0.00182  | 0.404 | -2.475247525 | PURA          | Purine-rich element binding protein A                                 |
| NM_002790 | 0.00425  | 0.402 | -2.487562189 | PSMA5         | Proteasome (prosome, macropain) subunit, alpha type, 5                |
| AK057950  | 0.0383   | 0.399 | -2.506265664 | FLJ30596      | Homo sapiens cDNA FLJ25221 fis, clone STM00723                        |
| NM_025144 | 0.00995  | 0.399 | -2.506265664 | FLJ22670      | kiaa1527 protein                                                      |
| NM_019598 | 0.0267   | 0.397 | -2.518891688 | KLK12         | Homo sapiens kallikrein 12 (KLK12), mRNA                              |
| NM_020232 | 0.0182   | 0.394 | -2.538071066 | MDS003        | tumor necrosis factor superfamily, member 5-induced protein 1         |
| Z80777    | 0.0465   | 0.393 | -2.544529262 | H2AFKP        | H2A histone family, member K, pseudogene                              |
| NM_021246 | 0.00844  | 0.392 | -2.551020408 | MEGT1         | Megakaryocyte-enhanced gene transcript 1 protein                      |
| NM_003536 | 0.00397  | 0.39  | -2.564102564 | H3FK          | H3 histone family, member K                                           |
| NM_004234 | 0.00167  | 0.39  | -2.564102564 | ZFP93         | Zinc finger protein 93 homolog (mouse)                                |
| AF067801  | 0.0455   | 0.389 | -2.570694087 | HDCGC21P      | Hypothetical protein HDCGC21P                                         |
| AK055523  | 0.0252   | 0.389 | -2.570694087 | SLC2A11       | Solute carrier family 2 (facilitated glucose transporter), member 11  |
| AF090094  | 0.0295   | 0.386 | -2.590673575 | OAZ1          | Ornithine decarboxylase antizyme 1                                    |
| AK055800  | 0.00324  | 0.385 | -2.597402597 | MGC49942      | Homo sapiens cDNA FLJ31238 fis, clone KIDNE2004864                    |
| AK054816  | 0.0378   | 0.383 | -2.610966057 | FTH1          | Ferritin, heavy polypeptide 1                                         |



|           |          |       |              |            |                                                                                  |
|-----------|----------|-------|--------------|------------|----------------------------------------------------------------------------------|
| NM_002512 | 0.0226   | 0.383 | -2.610966057 | NME2       | Non-metastatic cells 2, protein (NM23B) expressed in                             |
| AK057209  | 0.0047   | 0.382 | -2.617801047 | MGC4728    | similar to hypothetical protein flj23233                                         |
| NM_022135 | 0.0211   | 0.382 | -2.617801047 | POP2       | Popeye protein 2                                                                 |
| NM_002439 | 0.00106  | 0.381 | -2.624671916 | MSH3       | MutS homolog 3 (E. coli)                                                         |
| NM_004964 | 0.0103   | 0.377 | -2.652519894 | HDAC1      | Histone deacetylase 1                                                            |
| BC015213  | 0.00278  | 0.372 | -2.688172043 |            | flj37035 protein                                                                 |
| NM_001499 | 0.00958  | 0.372 | -2.688172043 | GLE1L      | GLE1 RNA export mediator-like (yeast)                                            |
| NM_003380 | 0.0139   | 0.372 | -2.688172043 | VIM        | Vimentin                                                                         |
| NM_021029 | 0.0357   | 0.372 | -2.688172043 | RPL36A     | Ribosomal protein L36a                                                           |
| NM_000942 | 0.0144   | 0.371 | -2.69541779  | PPIB       | Peptidylprolyl isomerase B (cyclophilin B)                                       |
| BC009198  | 0.0409   | 0.368 | -2.717391304 |            | family with sequence similarity 89, member a                                     |
| NM_013438 | 0.0064   | 0.367 | -2.72479564  | UBQLN1     | Ubiquilin 1                                                                      |
| NM_032121 | 0.0123   | 0.366 | -2.732240437 | DKFZp564K1 | implantation-associated protein                                                  |
| NM_004995 | 0.00247  | 0.362 | -2.762430939 | MMP14      | Matrix metalloproteinase 14 (membrane-inserted)                                  |
| NM_032414 | 0.000814 | 0.36  | -2.777777778 | PROK1      | Prokineticin 1 precursor                                                         |
| NM_003254 | 0.00842  | 0.359 | -2.78551532  | TIMP1      | Tissue inhibitor of metalloproteinase 1 (erythroid potentiating activity, collag |
| BF541376  | 0.00443  | 0.356 | -2.808988764 |            | ESTs, Weakly similar to FRHUL ferritin light chain [H.sapiens]                   |
| AK056357  | 0.00393  | 0.352 | -2.840909091 | FLJ31795   | coiled-coil domain containing 43                                                 |
| NM_001724 | 0.0264   | 0.35  | -2.857142857 | BPGM       | 2,3-bisphosphoglycerate mutase                                                   |
| NM_005268 | 0.023    | 0.347 | -2.88184438  | GJB5       | Gap junction protein, beta 5 (connexin 31.1)                                     |
| NM_014694 | 0.0353   | 0.344 | -2.906976744 | KIAA0605   | adamts-like 2                                                                    |
| NM_054110 | 0.0104   | 0.343 | -2.915451895 | GALNTL2    | Homo sapiens, Similar to RIKEN cDNA 4631401E18 gene, clone MGC:173               |
| NM_004046 | 0.0492   | 0.341 | -2.93255132  | ENSG000001 | ATP SYNTHASE ALPHA CHAIN, MITOCHONDRIAL PRECURSOR (EC 3.                         |
| NM_006985 | 0.00992  | 0.341 | -2.93255132  | NPIP       | Nuclear pore complex interacting protein                                         |
| AK024516  | 0.000179 | 0.336 | -2.976190476 | PSIP1      | pc4 and sfrs1 interacting protein 1                                              |
| AK023323  | 0.0388   | 0.332 | -3.012048193 | DHRS6      | Homo sapiens cDNA FLJ13261 fis, clone OVARC1000885, weakly similar t             |
| NM_001912 | 0.0181   | 0.327 | -3.058103976 | CTSL       | Cathepsin L                                                                      |
| D86358    | 0.0444   | 0.323 | -3.095975232 | SIGLEC6    | Sialic acid binding Ig-like lectin 6                                             |
| NM_017840 | 0.00325  | 0.322 | -3.105590062 | MRPL16     | Mitochondrial ribosomal protein L16                                              |
| NM_005147 | 0.0163   | 0.317 | -3.154574132 | DNAJA3     | DnaJ (Hsp40) homolog, subfamily A, member 3                                      |
| NM_005953 | 0.0327   | 0.315 | -3.174603175 | ENSG000001 | METALLOTHIONEIN-II (MT-II) (METALLOTHIONEIN 2A). [Source:SWISSF                  |
| NM_021104 | 0.0141   | 0.315 | -3.174603175 | RPL41      | Ribosomal protein L41                                                            |
| AK021571  | 0.00285  | 0.314 | -3.184713376 | RPL35A     | ribosomal protein l35a                                                           |
| J05582    | 0.0232   | 0.309 | -3.236245955 | MUC1       | Mucin 1, transmembrane                                                           |
| NM_007262 | 0.029    | 0.307 | -3.25732899  | DJ-1       | RNA-binding protein regulatory subunit                                           |
| AF273048  | 0.00774  | 0.304 | -3.289473684 | SLK        | Homo sapiens CTCL tumor antigen se20-9 mRNA, complete cds                        |
| NM_001908 | 0.00809  | 0.304 | -3.289473684 | CTSB       | Cathepsin B                                                                      |

|           |         |       |              |              |                                                                        |
|-----------|---------|-------|--------------|--------------|------------------------------------------------------------------------|
| AK055139  | 0.0125  | 0.302 | -3.311258278 | PTK2; FAK; F | ptk2 protein tyrosine kinase 2                                         |
| NM_006896 | 0.00532 | 0.3   | -3.333333333 | HOXA7        | Homeo box A7                                                           |
| AB033079  | 0.0261  | 0.299 | -3.344481605 | KIAA1253     | serine incorporator 1                                                  |
| NM_005388 | 0.0467  | 0.299 | -3.344481605 | PDCL         | Phosducin-like                                                         |
| BC001131  | 0.00273 | 0.294 | -3.401360544 | H2BFA        | H2B histone family, member A                                           |
| Z82188    | 0.0231  | 0.294 | -3.401360544 |              | Human DNA sequence from clone RP1-151B14 on chromosome 22 Contain      |
| NM_001961 | 0.0413  | 0.292 | -3.424657534 | EEF2         | Eukaryotic translation elongation factor 2                             |
| NM_014077 | 0.00754 | 0.292 | -3.424657534 | DKFZP586O    | family with sequence similarity 32, member a                           |
| S69284    | 0.0418  | 0.292 | -3.424657534 | TCR alpha    | Homo sapiens T-cell receptor alpha chain (TCR alpha) mRNA, partial cds |
| AK056063  | 0.0112  | 0.291 | -3.436426117 | LOC146443    | Homo sapiens cDNA FLJ31501 fis, clone NT2NE2005537                     |
| NM_003851 | 0.00433 | 0.29  | -3.448275862 | CREG         | Cellular repressor of E1A-stimulated genes                             |
| NM_023036 | 0.0117  | 0.288 | -3.472222222 | DNAI2        | Dynein intermediate chain 2                                            |
| AB040897  | 0.0365  | 0.285 | -3.50877193  | KIAA1464     | ran binding protein 10                                                 |
| AK057567  | 0.0169  | 0.281 | -3.558718861 | AP4B1        | adaptor-related protein complex 4, beta 1 subunit                      |
| NM_001030 | 0.0148  | 0.28  | -3.571428571 | RPS27        | Ribosomal protein S27 (metalloprotein 1)                               |
| AK023419  | 0.00962 | 0.278 | -3.597122302 | RPL37A       | Ribosomal protein L37a                                                 |
| NM_000884 | 0.0104  | 0.272 | -3.676470588 | IMPDH2       | IMP (inosine monophosphate) dehydrogenase 2                            |
| BC014951  | 0.0196  | 0.27  | -3.703703704 | C20orf107; d | chromosome 20 open reading frame 107                                   |
| NM_005433 | 0.0169  | 0.27  | -3.703703704 | YES1         | V-yes-1 Yamaguchi sarcoma viral oncogene homolog 1                     |
| AK056182  | 0.0314  | 0.268 | -3.731343284 |              | kelch repeat and btb (poz) domain containing 7                         |
| AK057966  | 0.0232  | 0.255 | -3.921568627 | LOC152185    | coiled-coil domain containing 52                                       |
| U81001    | 0.00817 | 0.254 | -3.937007874 | SNURF        | SNRPN upstream reading frame                                           |
| NM_003455 | 0.00338 | 0.253 | -3.95256917  | ZNF202       | Zinc finger protein 202                                                |
| NM_022784 | 0.00705 | 0.253 | -3.95256917  | FLJ12476     | iq motif containing h                                                  |
| NM_016224 | 0.0414  | 0.252 | -3.968253968 | SNX9         | Sorting nexin 9                                                        |
| AK057933  | 0.0463  | 0.251 | -3.984063745 |              | Homo sapiens, clone IMAGE:3460539, mRNA, partial cds                   |
| AF090097  | 0.0166  | 0.246 | -4.06504065  |              | Homo sapiens clone IMAGE 25997                                         |
| NM_006330 | 0.0444  | 0.244 | -4.098360656 | LYPLA1       | Lysophospholipase I                                                    |
| NM_032330 | 0.00858 | 0.235 | -4.255319149 | MGC12536     | calpain, small subunit 2                                               |
| AC007785  | 0.00215 | 0.228 | -4.385964912 |              | Homo sapiens chromosome 19, BAC 282485 (CIT-B-344H19)                  |
| NM_021631 | 0.0115  | 0.223 | -4.484304933 | FKSG2        | Apoptosis inhibitor                                                    |
| NM_002658 | 0.0142  | 0.219 | -4.566210046 | PLAU         | Plasminogen activator, urokinase                                       |
| NM_005499 | 0.0092  | 0.213 | -4.694835681 | UBA2         | SUMO-1 activating enzyme subunit 2                                     |
| AK026158  | 0.0189  | 0.21  | -4.761904762 | LOC348938    | ichthyin protein                                                       |
| BE884585  | 0.0115  | 0.21  | -4.761904762 |              | TCR eta                                                                |
| NM_014671 | 0.0345  | 0.21  | -4.761904762 | KIAA0010     | Ubiquitin-protein isopeptide ligase (E3)                               |
| NM_014363 | 0.00186 | 0.205 | -4.87804878  | SACS         | Spastic ataxia of Charlevoix-Saguenay (sacsin)                         |

|           |        |        |              |          |                                                         |
|-----------|--------|--------|--------------|----------|---------------------------------------------------------|
| NM_014216 | 0.0188 | 0.195  | -5.128205128 | ITPK1    | Inositol 1,3,4-triphosphate 5/6 kinase                  |
| NM_014000 | 0.0371 | 0.194  | -5.154639175 | VCL      | Vinculin                                                |
| NM_000100 | 0.0298 | 0.179  | -5.586592179 | CSTB     | Cystatin B (stefin B)                                   |
| NM_016565 | 0.0467 | 0.173  | -5.780346821 | LOC51287 | coiled-coil-helix-coiled-coil-helix domain containing 8 |
| AK021981  | 0.0379 | 0.159  | -6.289308176 |          | zinc finger rna binding protein                         |
| NM_003330 | 0.0047 | 0.138  | -7.246376812 | TXNRD1   | Thioredoxin reductase 1                                 |
| NM_003720 | 0.012  | 0.128  | -7.8125      | DSCR2    | Down syndrome critical region gene 2                    |
| NM_015702 | 0.0143 | 0.11   | -9.090909091 | CL25022  | Hypothetical protein                                    |
| AK026463  | 0.0221 | 0.0666 | -15.01501502 | B2M      | Beta-2-microglobulin                                    |
| AK056959  | 0.0453 | 0.0625 | -16          | THAP6    | thap domain containing 6                                |

**Supplementary Table 2: Gene Ontology Classification of differentially expressed genes**

Data tabulated using DAVID (Database for Annotation Visualization and Integrated Discovery)

|                               | <b>Enrichment Score</b> | <b># genes</b> |
|-------------------------------|-------------------------|----------------|
| <b><i>Metabolism</i></b>      | 1.91                    | 376            |
| <b><i>Development</i></b>     | 1.33                    | 153            |
| <b><i>Cell Death</i></b>      | 1.52                    | 45             |
| <b><i>Translation</i></b>     | 1.71                    | 35             |
| <b><i>Differentiation</i></b> | 1.27                    | 87             |

**Supplementary Table 3: Wnt Genes Identified in Lung Metastasis Signature**

| <b>Gene</b> | <b>Fold Change</b> | <b>p-value significant?</b> |
|-------------|--------------------|-----------------------------|
| LRP5        | -1.68              | yes                         |
| FZD9        | 1.59               | yes                         |
| WISP2       | 1.77               | yes                         |
| HOXA7       | -3.33              | yes                         |
| HOXD4       | 1.41               | yes                         |
| HOXB5       | 1.81               | yes                         |
| GNAQ        | 4.14               | yes                         |
| HDAC1       | -2.65              | yes                         |
| CDH23       | 1.56               | yes                         |
| NFATC3      | 1.6                | yes                         |
| CCND3       | 1.46               | yes                         |
| MYCL1       | 1.44               | yes                         |
| ACVRL1      | 1.59               | yes                         |
| Axin2       | 1.4                | no                          |
| Dvl2        | 1.89               | no                          |
| NFATC1      | 1.44               | no                          |
| CREB1       | -1.57              | no                          |
| Wnt7a       | -1.43              | no                          |
| CD24        | 2.03               | no                          |
| EN1         | 1.67               | no                          |
| MUC1        | -3.24              | no                          |

| Supplemental Table 4: Differentiation Array Gene List and References |             |           |                                                                                                    |                                                 |
|----------------------------------------------------------------------|-------------|-----------|----------------------------------------------------------------------------------------------------|-------------------------------------------------|
| Lineage                                                              | Gene Symbol | Refseq #  | Official Full Name                                                                                 | Reference                                       |
|                                                                      | ACTG2       | NM_001615 | Actin, gamma 2, smooth muscle, enteric                                                             |                                                 |
| Both*                                                                | ATF3        | NM_001674 | Activating transcription factor 3                                                                  | Oncomine                                        |
| Luminal*                                                             | BCL7A       | NM_020993 | B-cell CLL/lymphoma 7A                                                                             | Oncomine                                        |
| Basal*                                                               | BAP1        | NM_004656 | BRCA1 associated protein-1 (ubiquitin carboxy-terminal hydrolase)                                  | Oncomine                                        |
| Basal                                                                | BTG2        | NM_006763 | BTG family, member 2                                                                               | Shipitsin et al <i>Cancer Cell</i> 2007         |
| Luminal                                                              | CDH1        | NM_004360 | Cadherin 1, type 1, E-cadherin (epithelial)                                                        | Gudjonsson et al <i>Genes Dev</i> 2002          |
| Neither                                                              | CDH2        | NM_001792 | Cadherin 2, type 1, N-cadherin (neuronal)                                                          | Jones et al <i>Cancer Res</i> 2004              |
| Basal                                                                | CDH3        | NM_001793 | Cadherin 3, type 1, P-cadherin (placental)                                                         | Rasbridge et al <i>J of Pathol</i> 1992         |
| Luminal                                                              | CD24        | NM_013230 | CD24 molecule                                                                                      | Jones et al <i>Cancer Res</i> 2004              |
| Stem                                                                 | CD44        | NM_000610 | CD44 molecule (Indian blood group)                                                                 | Shipitsin et al <i>Cancer Cell</i> 2007         |
| Stem                                                                 | CXCR4       | NM_003467 | Chemokine (C-X-C motif) receptor 4                                                                 | Shen KC et al <i>Br Ca Res Treat</i> 2006       |
| Luminal                                                              | CX3CL1      | NM_002996 | Chemokine (C-X3-C motif) ligand 1                                                                  | Jones et al <i>Cancer Res</i> 2004              |
| Stem                                                                 | CHRD        | NM_003741 | Chordin                                                                                            | Shipitsin et al <i>Cancer Cell</i> 2007         |
| Luminal                                                              | CLDN1       | NM_021101 | Claudin 1                                                                                          | Gudjonsson et al <i>Genes Dev</i> 2002          |
| Luminal                                                              | CLDN7       | NM_001307 | Claudin 7                                                                                          | Blackman et al <i>Br Ca Res</i> 2005            |
| Luminal*                                                             | CLDN8       | NM_199328 | Claudin 8                                                                                          | Oncomine                                        |
| Basal                                                                | COL1A1      | NM_000088 | Collagen, type I, alpha 1                                                                          | Jones et al <i>Cancer Res</i> 2004              |
| Stem/Basal                                                           | EDNRB       | NM_000115 | Endothelin receptor type B                                                                         | Shipitsin et al <i>Cancer Cell</i> 2007         |
| Basal                                                                | EGFR        | NM_005228 | Epidermal growth factor receptor (erythroblastic leukemia viral (v-erb-b) oncogene homolog, avian) | Monaghan et al <i>Epithelial Cell Biol</i> 1995 |
| Luminal                                                              | ESR1        | NM_000125 | Estrogen receptor 1                                                                                | Shipitsin et al <i>Cancer Cell</i> 2007         |
| Basal                                                                | FGFR1       | NM_015850 | Fibroblast growth factor receptor 1                                                                | Shipitsin et al <i>Cancer Cell</i> 2007         |
| Basal/TGFb                                                           | FN1         | NM_002026 | Fibronectin 1                                                                                      | Shipitsin et al <i>Cancer Cell</i> 2007         |
| Luminal                                                              | FOXA1       | NM_004496 | Forkhead box A1                                                                                    | Shipitsin et al <i>Cancer Cell</i> 2007         |
| Basal                                                                | FOXC1       | NM_001453 | Forkhead box C1                                                                                    | Oncomine                                        |
| Stem                                                                 | FZD7        | NM_003507 | Frizzled homolog 7 (Drosophila)                                                                    | Assou et al <i>Stem Cells</i> 2007              |
| Stem*                                                                | FZD9        | NM_003508 | Frizzled homolog 9 (Drosophila)                                                                    | Oncomine                                        |
| Luminal                                                              | GATA3       | NM_002051 | GATA binding protein 3                                                                             | Shipitsin et al <i>Cancer Cell</i> 2007         |
| Stem                                                                 | HOXB5       | NM_002147 | Homeobox B5                                                                                        | Phinney et al <i>Biochem Biophys Res</i> 2005   |
| Stem                                                                 | ID1         | NM_002165 | Inhibitor of DNA binding 1, dominant negative helix-loop-helix protein                             | Perry et al <i>Blood</i> 2007                   |
| Stem                                                                 | ID3         | NM_002167 | Inhibitor of DNA binding 3, dominant negative helix-loop-helix protein                             | Shipitsin et al <i>Cancer Cell</i> 2007         |
| Stem                                                                 | ID4         | NM_001546 | Inhibitor of DNA binding 4, dominant negative helix-loop-helix protein                             | Shipitsin et al <i>Cancer Cell</i> 2007         |
| Stem/Basal                                                           | IGFBP7      | NM_001553 | Insulin-like growth factor binding protein 7                                                       | Shipitsin et al <i>Cancer Cell</i> 2007         |
| Basal                                                                | ITGA6       | NM_000210 | Integrin, alpha 6                                                                                  | Jones et al <i>Cancer Res</i> 2004              |
| Basal                                                                | ITGB1       | NM_002211 | Integrin, beta 1 (fibronectin receptor, beta polypeptide, antigen CD29 includes MDF2, MSK12)       | Shipitsin et al <i>Cancer Cell</i> 2007         |
| Luminal                                                              | ITGB4       | NM_000213 | Integrin, beta 4                                                                                   | Lu S et al <i>Clin Can Res</i> 2008             |
| Stem                                                                 | IL1R1       | NM_000877 | Interleukin 1 receptor, type I                                                                     | Shipitsin et al <i>Cancer Cell</i> 2007         |
| Luminal                                                              | JUP         | NM_002230 | Junction plakoglobin                                                                               | Shipitsin et al <i>Cancer Cell</i> 2007         |

|            |          |              |                                                                                               |                                                   |
|------------|----------|--------------|-----------------------------------------------------------------------------------------------|---------------------------------------------------|
| Basal      | KRT14    | NM_000526    | Keratin 14                                                                                    | Gudjonsson et al <i>Genes Dev</i> 2002            |
| Basal      | KRT17    | NM_000422    | Keratin 17                                                                                    | Shipitsin et al <i>Cancer Cell</i> 2007           |
| Stem       | KRT19    | NM_002276    | Keratin 19                                                                                    | Gudjonsson et al <i>Genes Dev</i> 2002            |
| Luminal    | KRT18    | NM_000224    | Keratin 18                                                                                    | Jones et al <i>Cancer Res</i> 2004                |
| Basal      | KRT5     | NM_000424    | Keratin 5                                                                                     | Bocker W et al <i>Vir Arch A Pathol Anat</i> 1992 |
| Luminal    | KRT8     | NM_002273    | Keratin 8                                                                                     | Shipitsin et al <i>Cancer Cell</i> 2007           |
| Basal      | LCN2     | NM_005564    | Lipocalin 2                                                                                   | Shipitsin et al <i>Cancer Cell</i> 2007           |
| Stem       | LRP1     | NM_002332    | Low density lipoprotein-related protein 1 (alpha-2-macroglobulin receptor)                    | Shipitsin et al <i>Cancer Cell</i> 2007           |
| Stem       | MMP14    | NM_004995    | Matrix metalloproteinase 14 (membrane-inserted)                                               | Shipitsin et al <i>Cancer Cell</i> 2007           |
| Luminal    | MMP7     | NM_002423    | Matrix metalloproteinase 7 (matrilysin, uterine)                                              | Shipitsin et al <i>Cancer Cell</i> 2007           |
| Basal      | MMP9     | NM_004994    | Matrix metalloproteinase 9 (gelatinase B, 92kDa gelatinase, 92kDa type IV collagenase)        | Shipitsin et al <i>Cancer Cell</i> 2007           |
| Basal      | CALLA    | NM_000902    | Membrane metallo-endopeptidase                                                                | Gudjonsson et al <i>Genes Dev</i> 2002            |
| Stem       | MSX1     | NM_002448    | Msh homeobox 1                                                                                | Shipitsin et al <i>Cancer Cell</i> 2007           |
| Luminal    | MUC1     | NM_001018016 | Mucin 1, cell surface associated                                                              | Gudjonsson et al <i>Genes Dev</i> 2002            |
| Basal*     | NPY1R    | NM_000909    | Neuropeptide Y receptor Y1                                                                    | Oncomine                                          |
| Stem       | NOTCH1   | NM_017617    | Notch homolog 1, translocation-associated (Drosophila)                                        | Shipitsin et al <i>Cancer Cell</i> 2007           |
| Stem       | NOTCH3   | NM_000435    | Notch homolog 3 (Drosophila)                                                                  | Sansone et al <i>Stem Cells</i> 2007              |
| Basal      | OXTR     | NM_000916    | Oxytocin receptor                                                                             | Bussolati et al <i>Am J Pathol</i> 1996           |
| Stem       | BMI1     | NM_005180    | BMI1 polycomb ring finger oncogene                                                            | Liu et al <i>Cancer Res</i> 2006                  |
| Luminal    | PGR      | NM_000926    | Progesterone receptor                                                                         | Kariagina A et al <i>Endocrinology</i> 2007       |
| Luminal    | PRLR     | NM_000949    | Prolactin receptor                                                                            | Gill S et al <i>J Clin Pathol</i> 2001            |
| Luminal    | PROM1    | NM_006017    | Prominin 1                                                                                    | Sleeman et al <i>JCB</i> 2006                     |
| Stem       | PROCR    | NM_006404    | Protein C receptor, endothelial (EPCR)                                                        | Shipitsin et al <i>Cancer Cell</i> 2007           |
| Basal*     | PCDH8    | NM_002590    | Protocadherin 8                                                                               | Oncomine                                          |
| Basal      | MYLK     | NM_053025    | Myosin light chain kinase                                                                     | Jones et al <i>Cancer Res</i> 2004                |
| stem       | CDKN1A   | NM_000389    | Cyclin-dependent kinase inhibitor 1A (p21, Cip1)                                              | Shipitsin et al <i>Cancer Cell</i> 2007           |
| Luminal    | SFRP1    | NM_003012    | Secreted frizzled-related protein 1                                                           | Shipitsin et al <i>Cancer Cell</i> 2007           |
| Stem/Basal | SPARC    | NM_003118    | Secreted protein, acidic, cysteine-rich (osteonectin)                                         | Shipitsin et al <i>Cancer Cell</i> 2007           |
| Stem       | SERPINE1 | NM_000602    | Serpin peptidase inhibitor, clade E (nexin, plasminogen activator inhibitor type 1), member 1 | Shipitsin et al <i>Cancer Cell</i> 2007           |
| Luminal *  | SLC39A6  | NM_012319    | Solute carrier family 39 (zinc transporter), member 6                                         | Dressman et al <i>Pharmacogenomics</i> 2001       |
| Luminal    | SUSD3    | NM_145006    | Sushi domain containing 3                                                                     | Oncomine                                          |
| Basal/TGFb | THSD1    | NM_199263    | Thrombospondin, type I, domain containing 1                                                   | Shipitsin et al <i>Cancer Cell</i> 2007           |
| Basal      | THY1     | NM_006288    | Thy-1 cell surface antigen                                                                    | Gudjonsson et al <i>Genes Dev</i> 2002            |
| Basal      | TIMP1    | NM_003254    | TIMP metalloproteinase inhibitor 1                                                            | Jones et al <i>Cancer Res</i> 2004                |
| Stem/TGFb  | TGFB1    | NM_000660    | Transforming growth factor, beta 1                                                            | Shipitsin et al <i>Cancer Cell</i> 2007           |
| Stem/TGFb  | TGFB3    | NM_003239    | Transforming growth factor, beta 3                                                            | Shipitsin et al <i>Cancer Cell</i> 2007           |
| Stem/TGFb  | TGFBI    | NM_000358    | Transforming growth factor, beta-induced, 68kDa                                               | Shipitsin et al <i>Cancer Cell</i> 2007           |
| Stem/TGFb  | TAGLN    | NM_003186    | Transgelin                                                                                    | Shipitsin et al <i>Cancer Cell</i> 2007           |
| Luminal    | TFF3     | NM_003226    | Trefoil factor 3 (intestinal)                                                                 | Shipitsin et al <i>Cancer Cell</i> 2007           |
| Luminal    | TTYH1    | NM_020659    | Tweety homolog 1 (Drosophila)                                                                 | Oncomine                                          |

|              |       |           |                                                                                                                |                                         |
|--------------|-------|-----------|----------------------------------------------------------------------------------------------------------------|-----------------------------------------|
| Luminal      | ERBB2 | NM_004448 | V-erb-b2 erythroblastic leukemia viral oncogene homolog 2, neuro/glioblastoma derived oncogene homolog (avian) | Shipitsin et al <i>Cancer Cell</i> 2007 |
| Luminal      | ERBB3 | NM_001982 | V-erb-b2 erythroblastic leukemia viral oncogene homolog 3 (avian)                                              | Jones et al <i>Cancer Res</i> 2004      |
| Luminal*     | MYB   | NM_005375 | V-myb myeloblastosis viral oncogene homolog (avian)                                                            | Drabsch et al <i>PNAS</i> 2007          |
| Basal        | VIM   | NM_003380 | Vimentin                                                                                                       | Shipitsin et al <i>Cancer Cell</i> 2007 |
| Luminal      | XBP1  | NM_005080 | X-box binding protein 1                                                                                        | Shipitsin et al <i>Cancer Cell</i> 2007 |
| Basal        | TP63  | NM_003722 | Tumor protein p63                                                                                              | Reis-Filho et al <i>Cancer</i> 2003     |
| Luminal/Stem | EPCAM | NM_002354 | Epithelial cell adhesion molecule                                                                              | Gudjonsson et al <i>Genes Dev</i> 2002  |
|              |       |           |                                                                                                                |                                         |

\* Expression associated with tumor subtypes (luminal or basal) as not examined in normal cells

Oncomine = genes selected from the correlation gene lists with statistical significance for basal or ER+ luminal tumor subtypes



**Supplementary Table 5: Primer sequences used for Quantitative Real Time PCR**

| Gene   |   | Sequence                      | Reference                       |
|--------|---|-------------------------------|---------------------------------|
| sFRP1  | F | ATG CAG TTC TTC GGC TTC TAC T |                                 |
|        | R | AGG GAG GAC ACA CCG TTG TG    |                                 |
| Lrp6   | F | CCC ATG CCC CTG GTT CTA CT    |                                 |
|        | R | CCA AGC CAC AGG GAT ACA GT    |                                 |
| Slug   | F | GCA TTT CTT CAC TCC GAA GC    |                                 |
|        | R | TGA ATT CCA TGC TCT TGC AG    |                                 |
| Twist  | F | GGA GTC CGC AGT CTT ACG AG    | Yang et al; Cell 2004 (Ref #47) |
|        | R | TCT GGA GGA CCT GGT AGA GG    | Yang et al; Cell 2004 (Ref #47) |
| WISP2  | F | ATA TTA ACA CGC TGC CTG GTC   |                                 |
|        | R | TGT GTG CCT TCT GTT CAT CCT   |                                 |
| FZD9   | F | TCA AGG TCA GGC AAG TGA GCA   |                                 |
|        | R | AGC TTC CAG AGG AAC GCA ACA   |                                 |
| Lrp5   | F | CTC CCT CGA GAC CAA TAA CAA C |                                 |
|        | R | GTG AGT AGA GGG CAC TCA GGA T |                                 |
| HOXD4  | F | AAC ACT AAA GGC AGG TCA TCG T |                                 |
|        | R | GGG TCC CCA CTT CTA TAA GGT C |                                 |
| GAPDH  | F | GAG TCA ACG GAT TTG GTC GT    |                                 |
|        | R | GAC AAG CTT CCC GTT CTC AG    |                                 |
| Axin 2 | F | ACA TGA TGG AAT CAA TCT GCT G |                                 |
|        | R | ATC AAG ACG GTG CTT ACC TGT T |                                 |
| RXRA   | F | TTA AGA TGC TTT GGA GCA GAC A |                                 |
|        | R | CGA AGC TTT CAC CTC AAT CTC T |                                 |
| TIMP1  | F | ATA CTT CCA CAG GTC CCA CAA C |                                 |
|        | R | AGC CAA CAG TGT AGG TCT TGG T |                                 |
| HUNK   | F | GGC AAA GTG CCC TGT AAT GT    |                                 |
|        | R | AGC AGA GGC TGT CCT GGA T     |                                 |
| DVL2   | F | GCC TTT TTG GGG GTT AAA ATA G |                                 |
|        | R | TAA CTG GAG GAG GAG GTC ACA T |                                 |
| DKK1   | F | CAT CAG ACT GTG CCT CAG GA    |                                 |
|        | R | CCA CAG TAA CAA CGC TGG AA    |                                 |
